# Supplementary material for: A mitochondrion-targeted natural polyphenolic copper carrier overcomes tumor resistance to cisplatin by potentiating cuproptosis
Source: Research Square preprint supplement (doi:10.21203/rs.3.rs-7551173/v1), 2025-09-19
Supplement: Supplementary file 1 [file 28a5a2d2ac3bf84cb257b7a3.docx]

**A mitochondrion-targeted natural polyphenolic copper carrier overcomes tumor resistance to cisplatin by potentiating cuproptosis**

Haoyu Yanga#, Xiang Xiongb#, Xin Chena, Siqi Huanga, Hongfang Daia, Liqin Yuanb*, Jialong Fan c, Zhenhong Xiang a, Wei Wang a*, Yan Qin a*

a School of Pharmacy, Hunan University of Chinese Medicine, Changsha, Hunan, 410208, P.R. China

b The Second Xiangya Hospital, Central South University, Changsha, Hunan, 410011, P.R. China

c Hunan Provincial Key Laboratory of the Research and Development of Novel Pharmaceutical Preparations, Changsha Medical University, Changsha, China

# These authors contributed equally to this work and should be regarded as the first authors

* To whom correspondence should be addressed. Tel: +86–731–88458223;

E–mail: Yan Qin (email, [qin86yan@hotmail.com](mailto:qin86yan@hotmail.com)); Wei Wang (email, wangwei402@hotmail. com); Liqin Yuan (email, yuanliqin@csu.edu.cn)

**Contents**

**Figure S1. The characterization of bm–Cur3**

**Figure S2.** **HRLC-MS spectrometry of bm–Cur reaction with GSH4**

**Figure S3. The Uv-vis spectra of bm–Cur reaction with GSH4**

**Figure S4.** **The GSH consumption capacity test of bm–Cur 5**

**Figure S5. Cytotoxicity of bm–Cur on cisplatin-sensitive hepatocellular carcinoma cells5**

**Figure S6.** **Cytotoxicity of bm–Cur on cisplatin-resistant hepatocellular carcinoma cells6**

**Figure S7. Stability test of bCCM6**

**Figure S8. bm–Cur content detection in bCCM6**

**Figure S9.** **The GSH consumption capacity test of bCCM7**

**Figure S10. Detection of GSH levels with different treatments on HepG2 cells7**

**Figure S11. Quantification of xCT proteins in BEL7402/DDP cells8**

**Table S1. IC50 for different cells with different administrations8**

**Figure S12. The CCK-8 assay of AML-12 cells treat with bCCM8**

**Figure S13. Bright field image of BEL7402/DDP cells for Live/dead staining9**

**Figure S14. Bright field image of BEL7402/DDP cells for apoptosis9**

**Figure S15. Bright field image of BEL7402/DDP cells for intracellular copper ions levels detection9**

**Figure S16. Cytotoxicity of copper ions on BEL7402/DDP cells9**

**Figure S17. Cytotoxicity of UK5099 on BEL7402/DDP cells10**

**Figure S18.** **Quantification of drug-resistant proteins in BEL7402/DDP cells10**

**Figure S19. Transcriptomics analysis of BEL7402/DDP cells with bCCM treatment11**

**Figure S20.** **Mitochondrial GSH detection on HepG2 cells11**

**Figure S21.** **Quantitative analysis of Western blot at mitochondrial level12**

**Figure S22. Zebrafish toxicity assay13**

**Figure S23. Hemolysis test of bCCM****14**

**Figure S24. Biosafety and biocompability assay of bCCM14**

**Figure S25. Quantitative analysis of mean fluorescence by Tunel assay15**


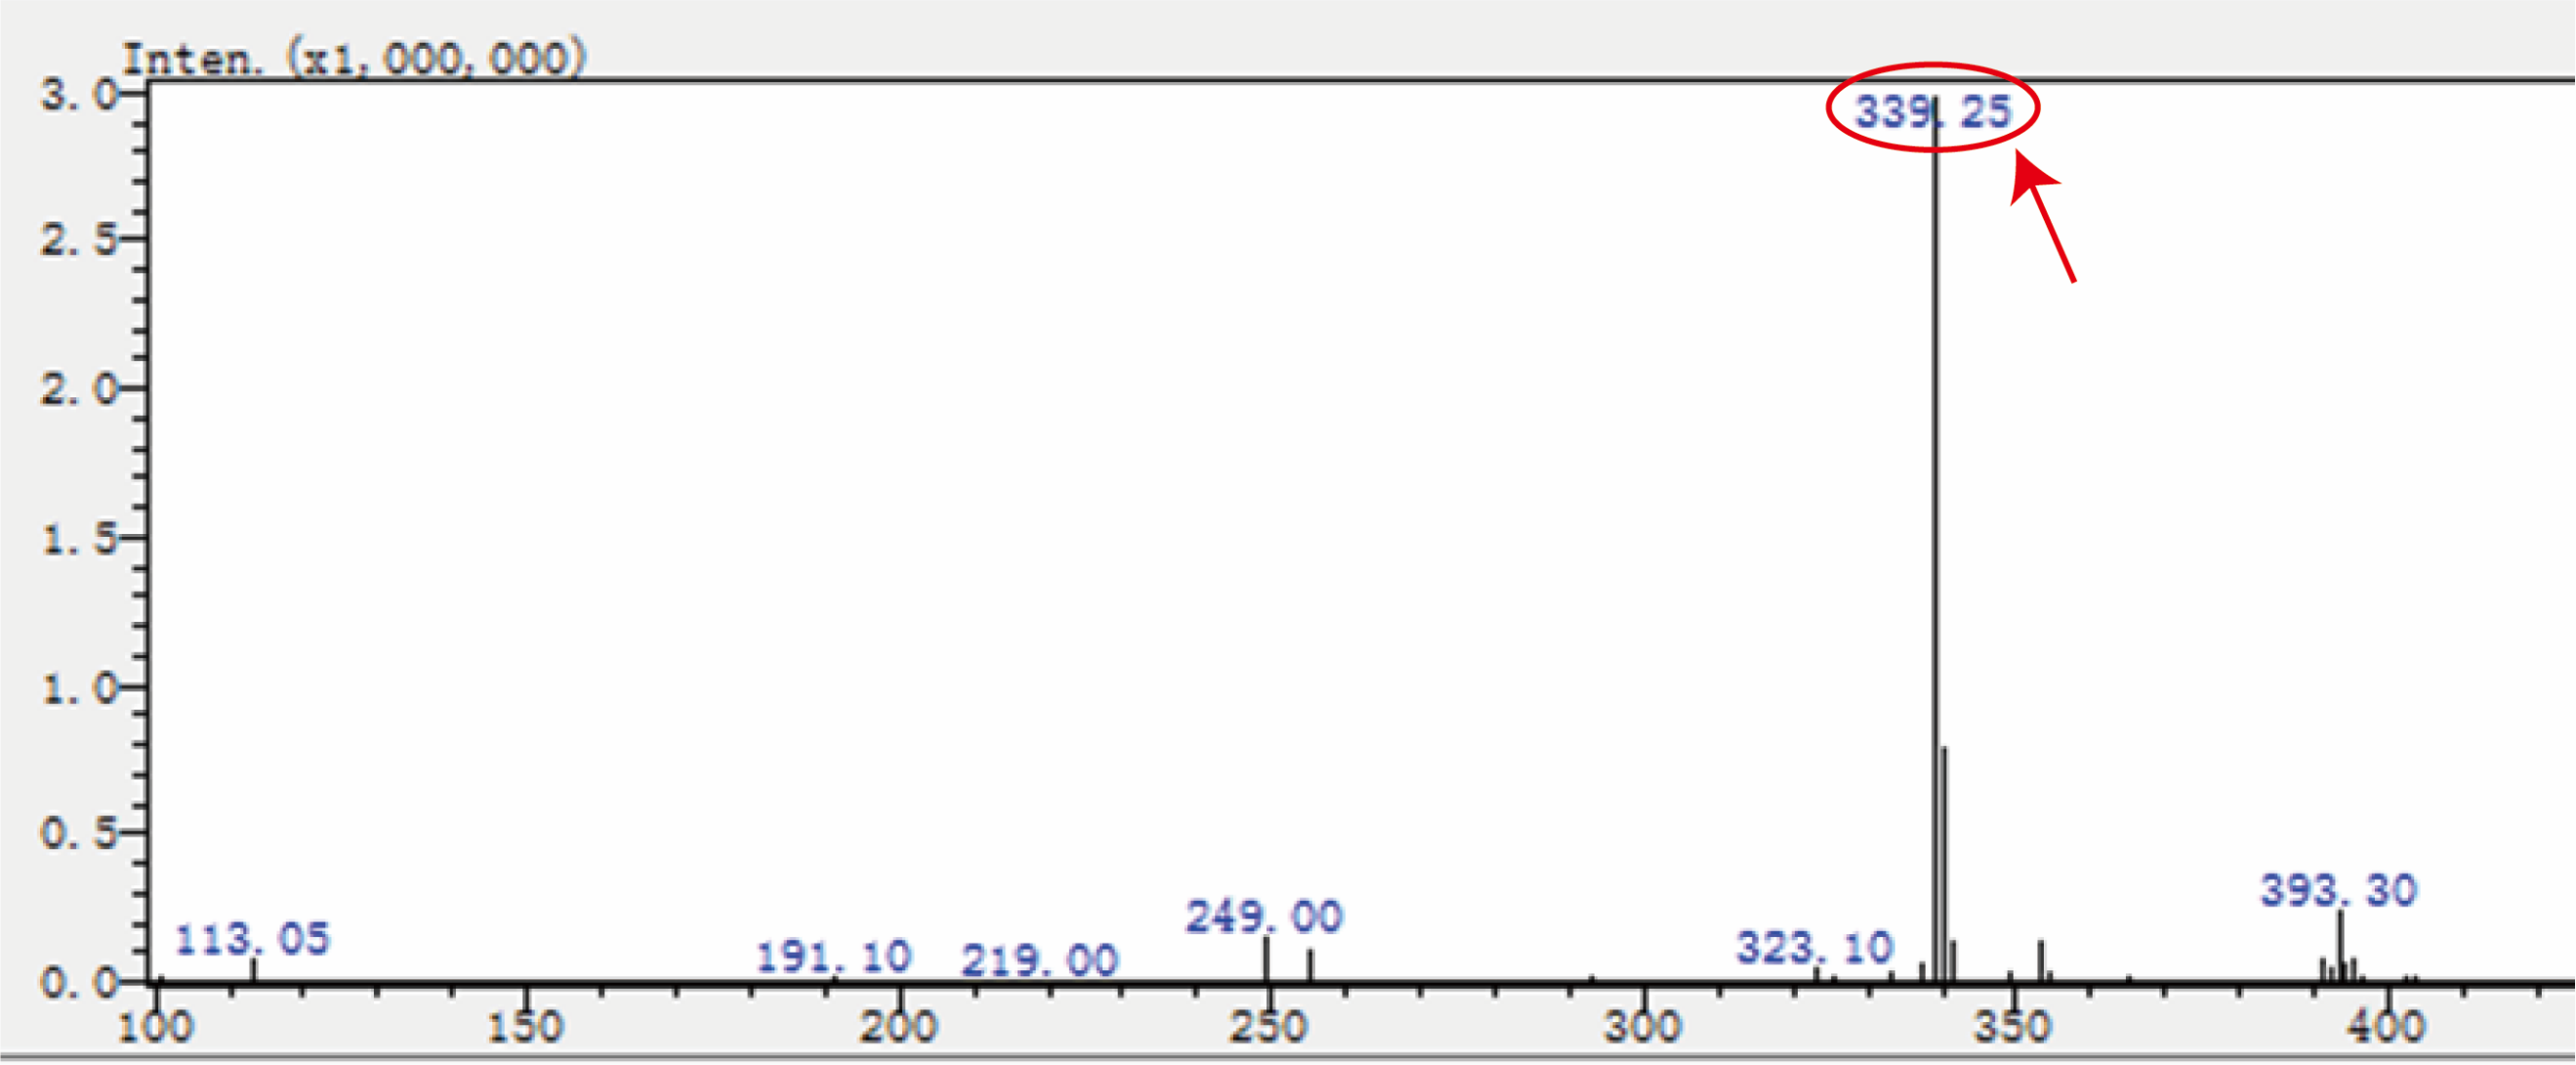


**Fig. S1.** The characterization of bm–Cur. Low resolution liquid chromatography-mass spectrometry of bm–Cur. ESI- scanning for C19H16O6 (Mw = 340.33) detected [M - H] - at m/z = 339.25.


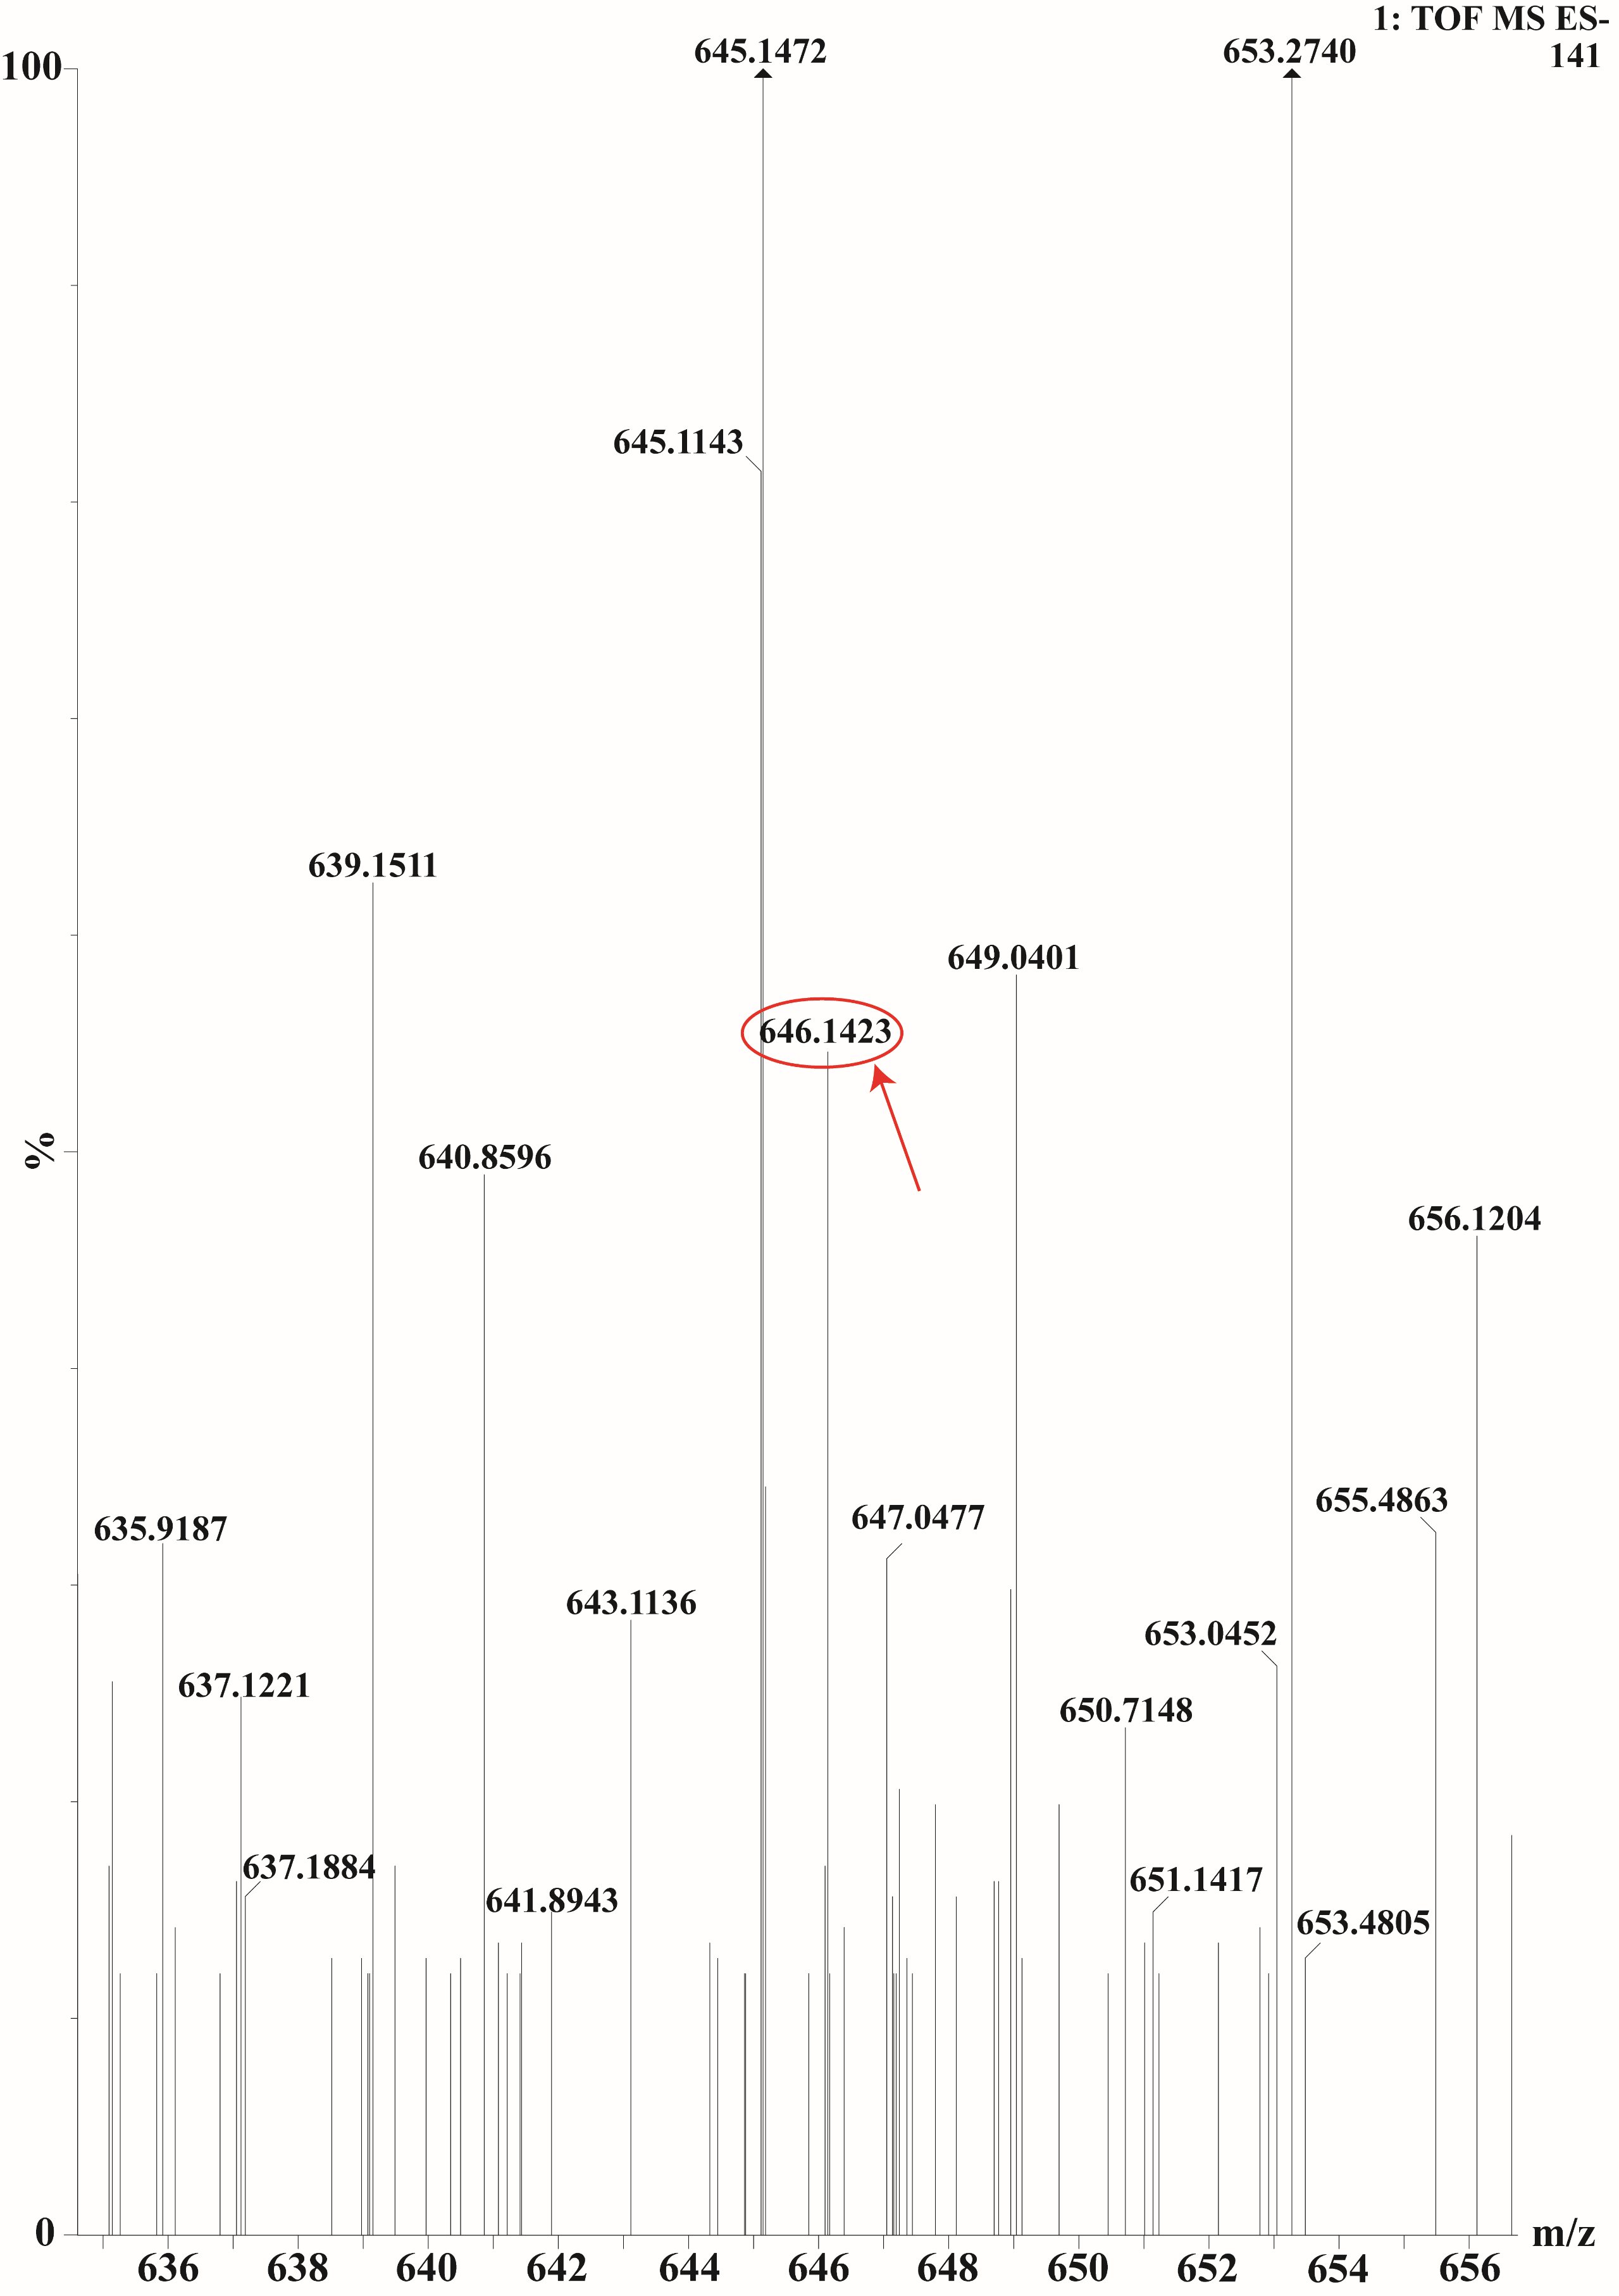


**Fig. S2.** High-resolution liquid chromatography-mass spectrometry of bm–Cur (40 μM) reaction with GSH (10 mM) for 24 h. ESI- scanning for C29H33N3O12S (Mw = 647.18) detected [M - H] - at m/z = 646.1423.


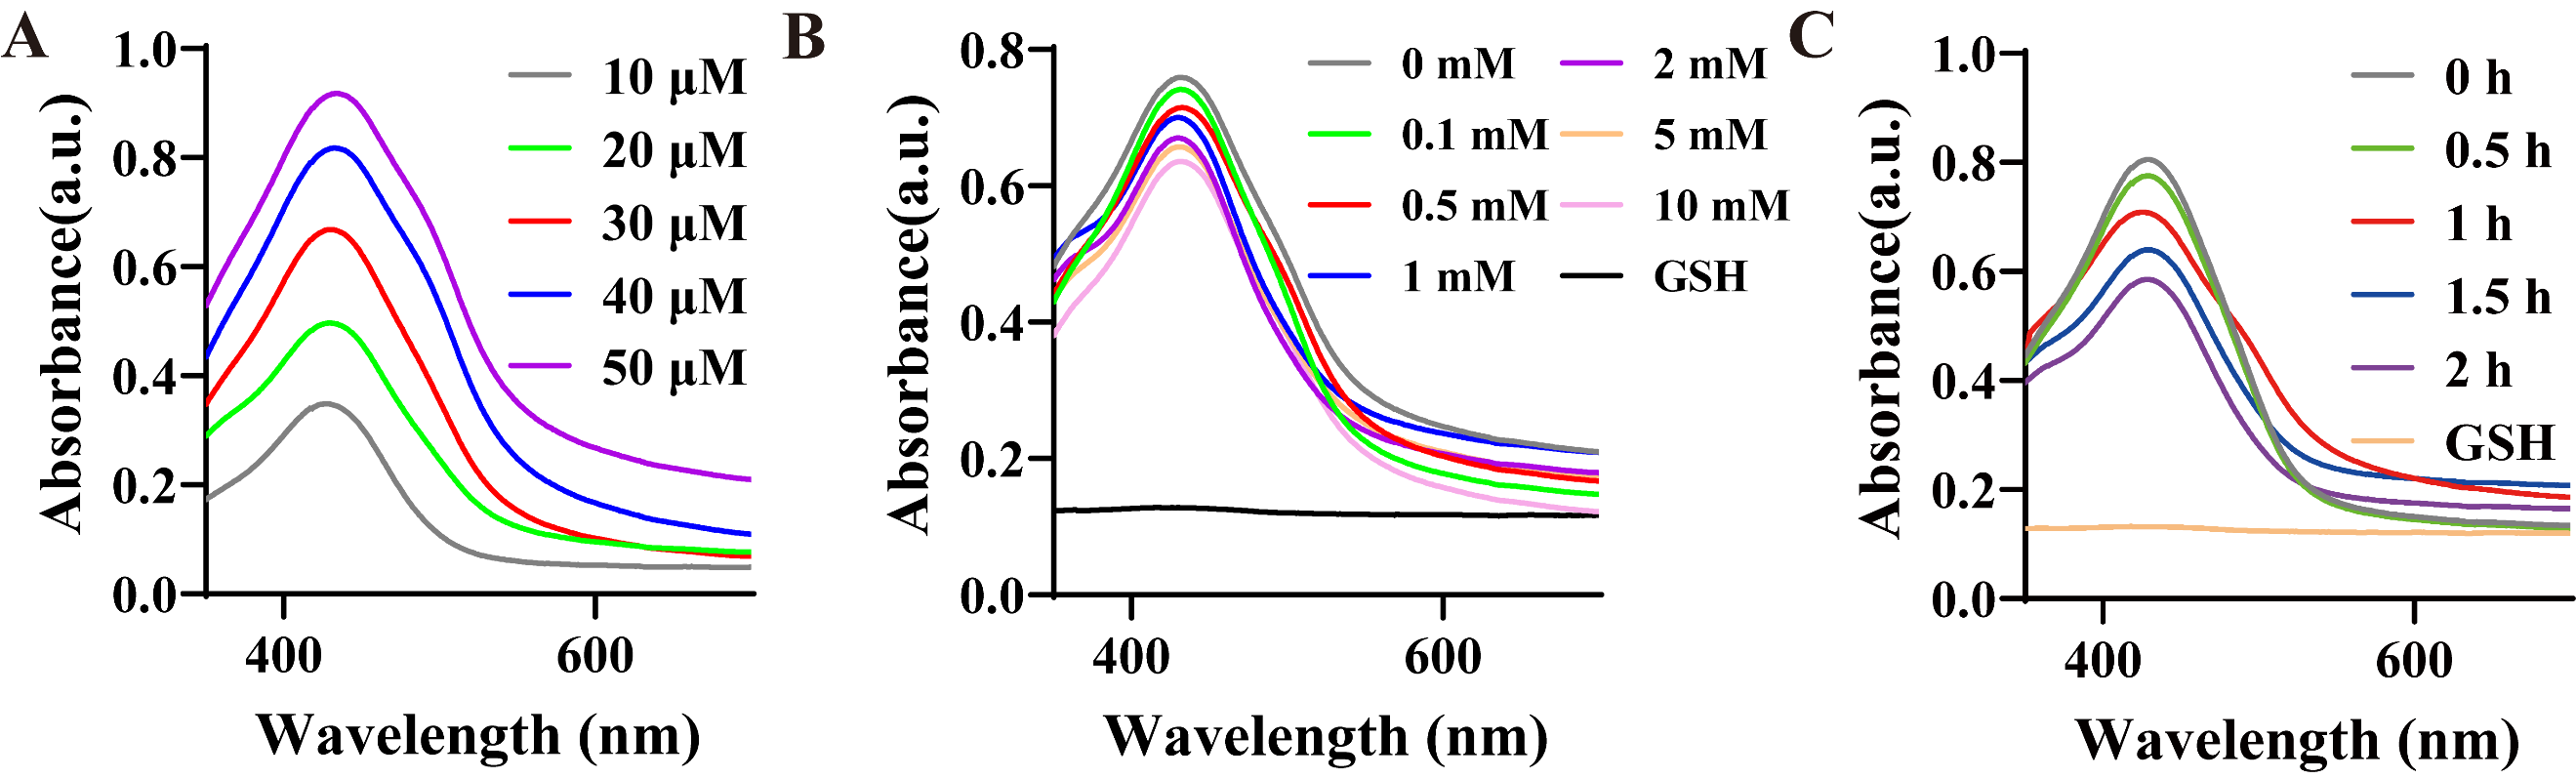


**Fig. S3.** The Uv-vis spectra of bm–Cur reaction with GSH. (A) UV–vis spectra of different bm–Cur concentrations. (B) UV–vis spectra of bm–Cur (40 μM) reaction with different GSH concentrations for 1 h. (C) UV–vis spectra of bm–Cur (40 μM) reaction with 10 mM GSH over time.

**Fig. S4.** GSH consumption capacity test of bm–Cur. The consumed GSH of BEL7402/DDP cells with different concentrations of bm–Cur treatments for 24 h. (n ≥ 3; error bars represent SD, *P ≤ 0.05; **P ≤ 0.01; ***P ≤ 0.001; ****P ≤ 0.0001).


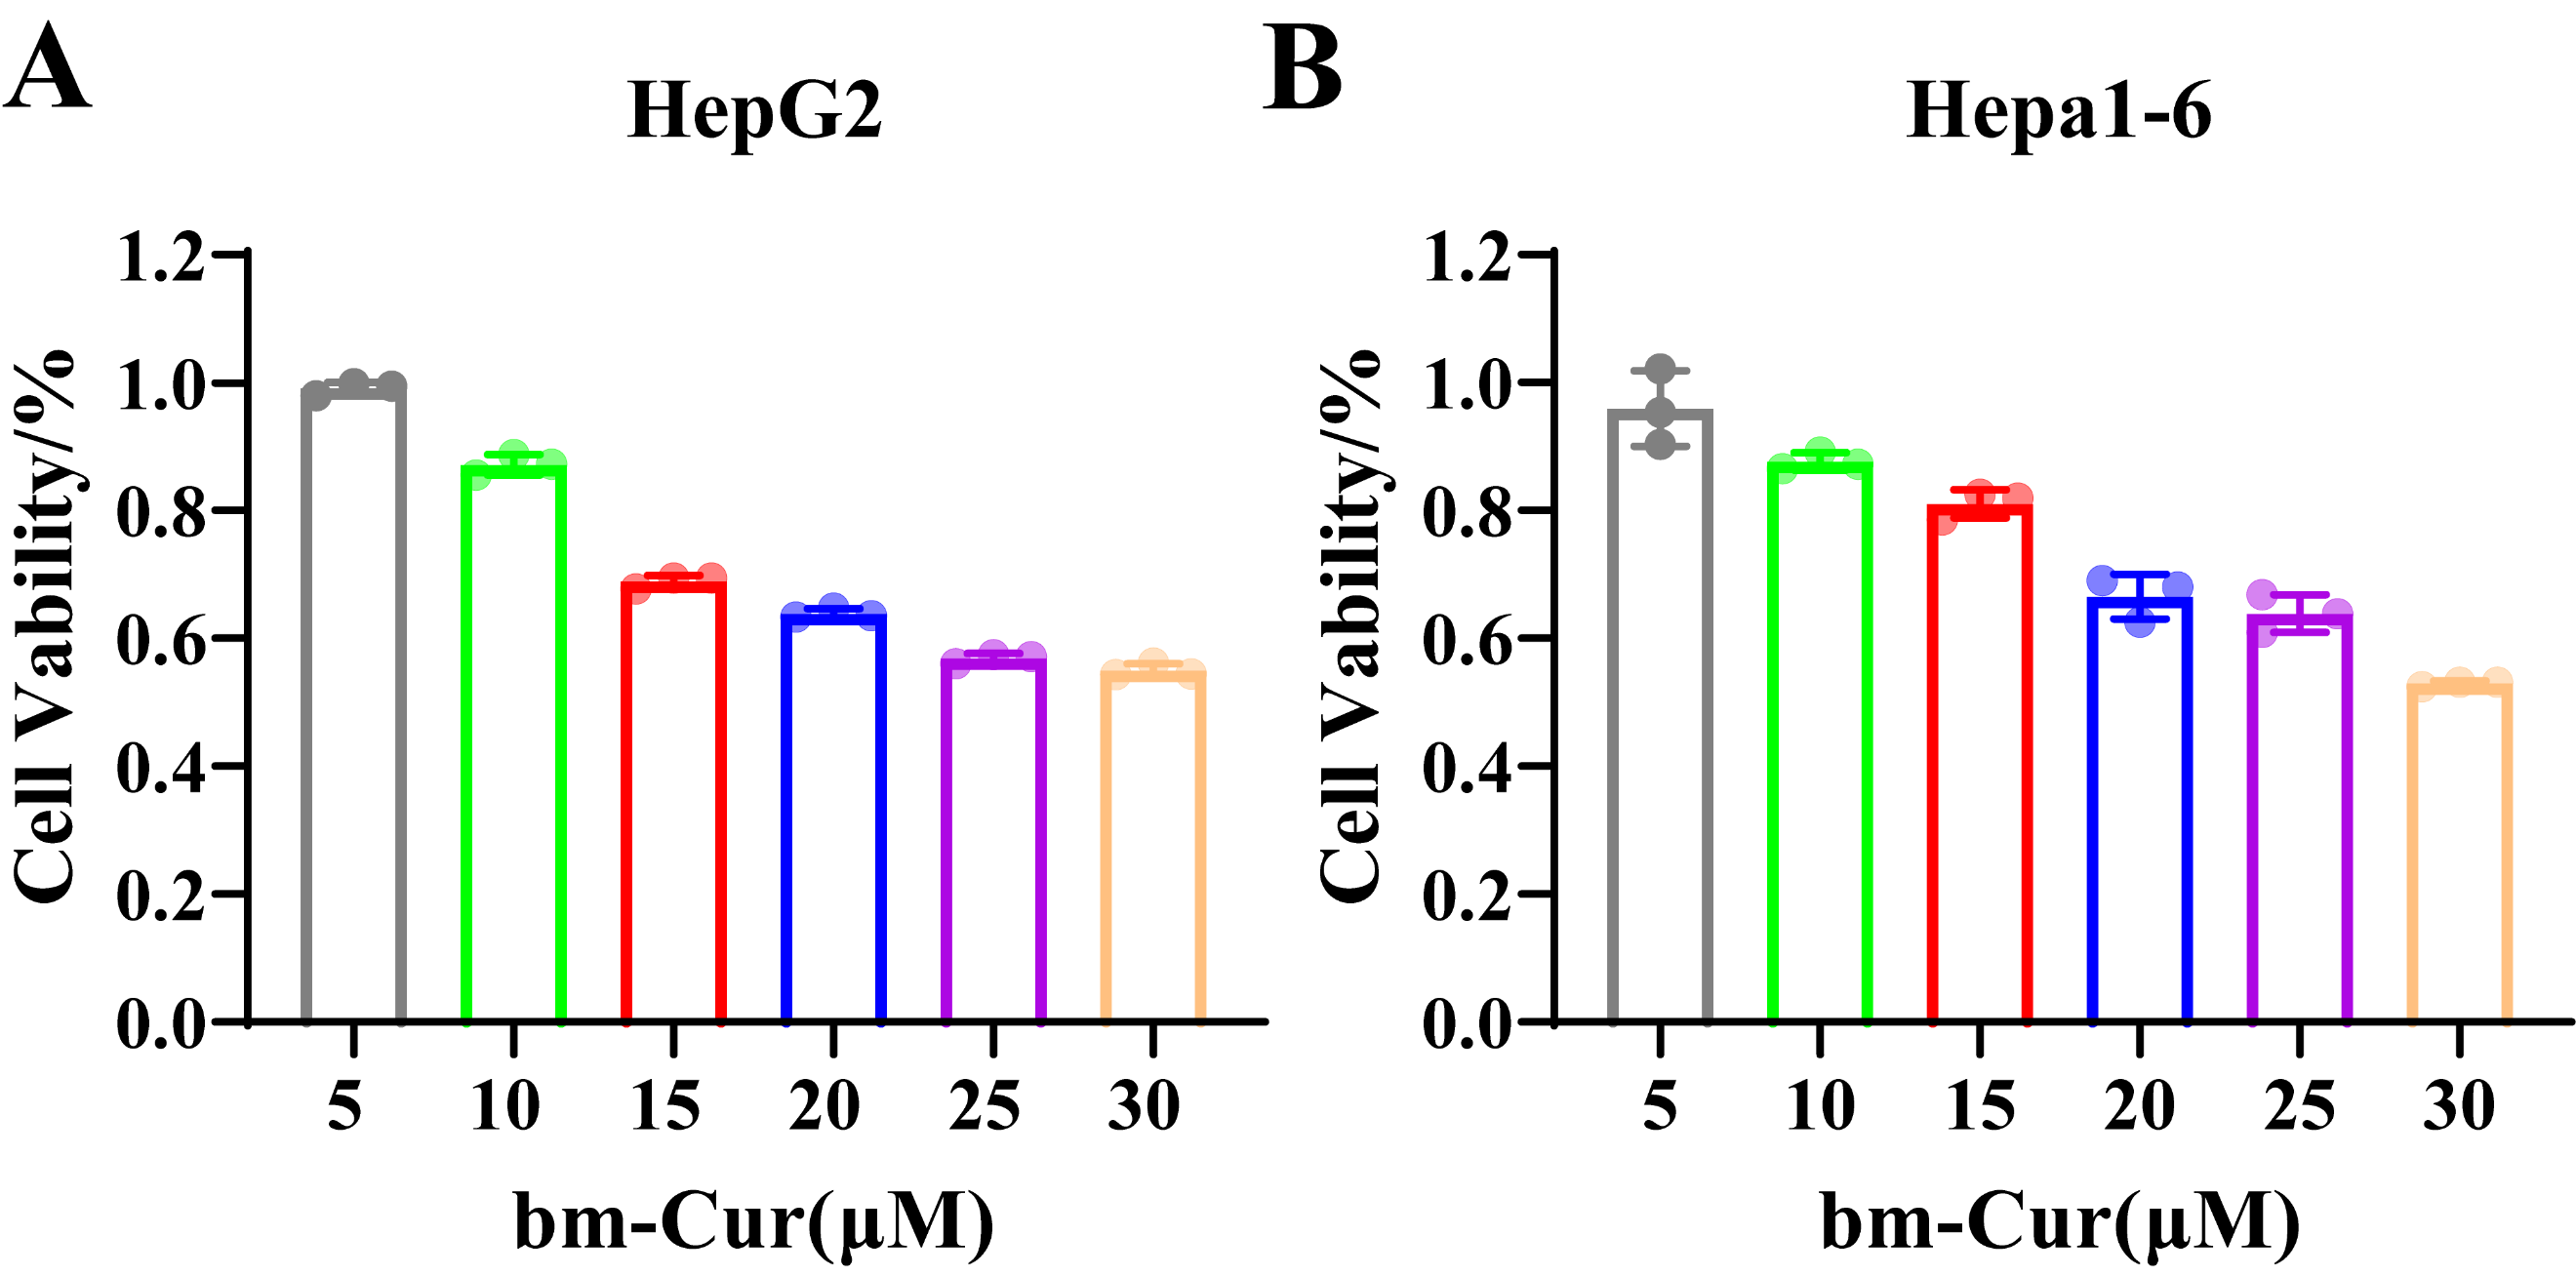


**Fig. S5.** Cytotoxicity of bm–Cur on cisplatin-sensitive hepatocellular carcinoma cells. (A-B) The cell viability of Hepatocellular carcinoma sensitive cells (HepG2 and Hepa1-6 cells) treated with different concentrations of bm–Cur for 48 h. (n ≥ 3; error bars represent SD, *P ≤ 0.05; **P ≤ 0.01; ***P ≤ 0.001; ****P ≤ 0.0001).


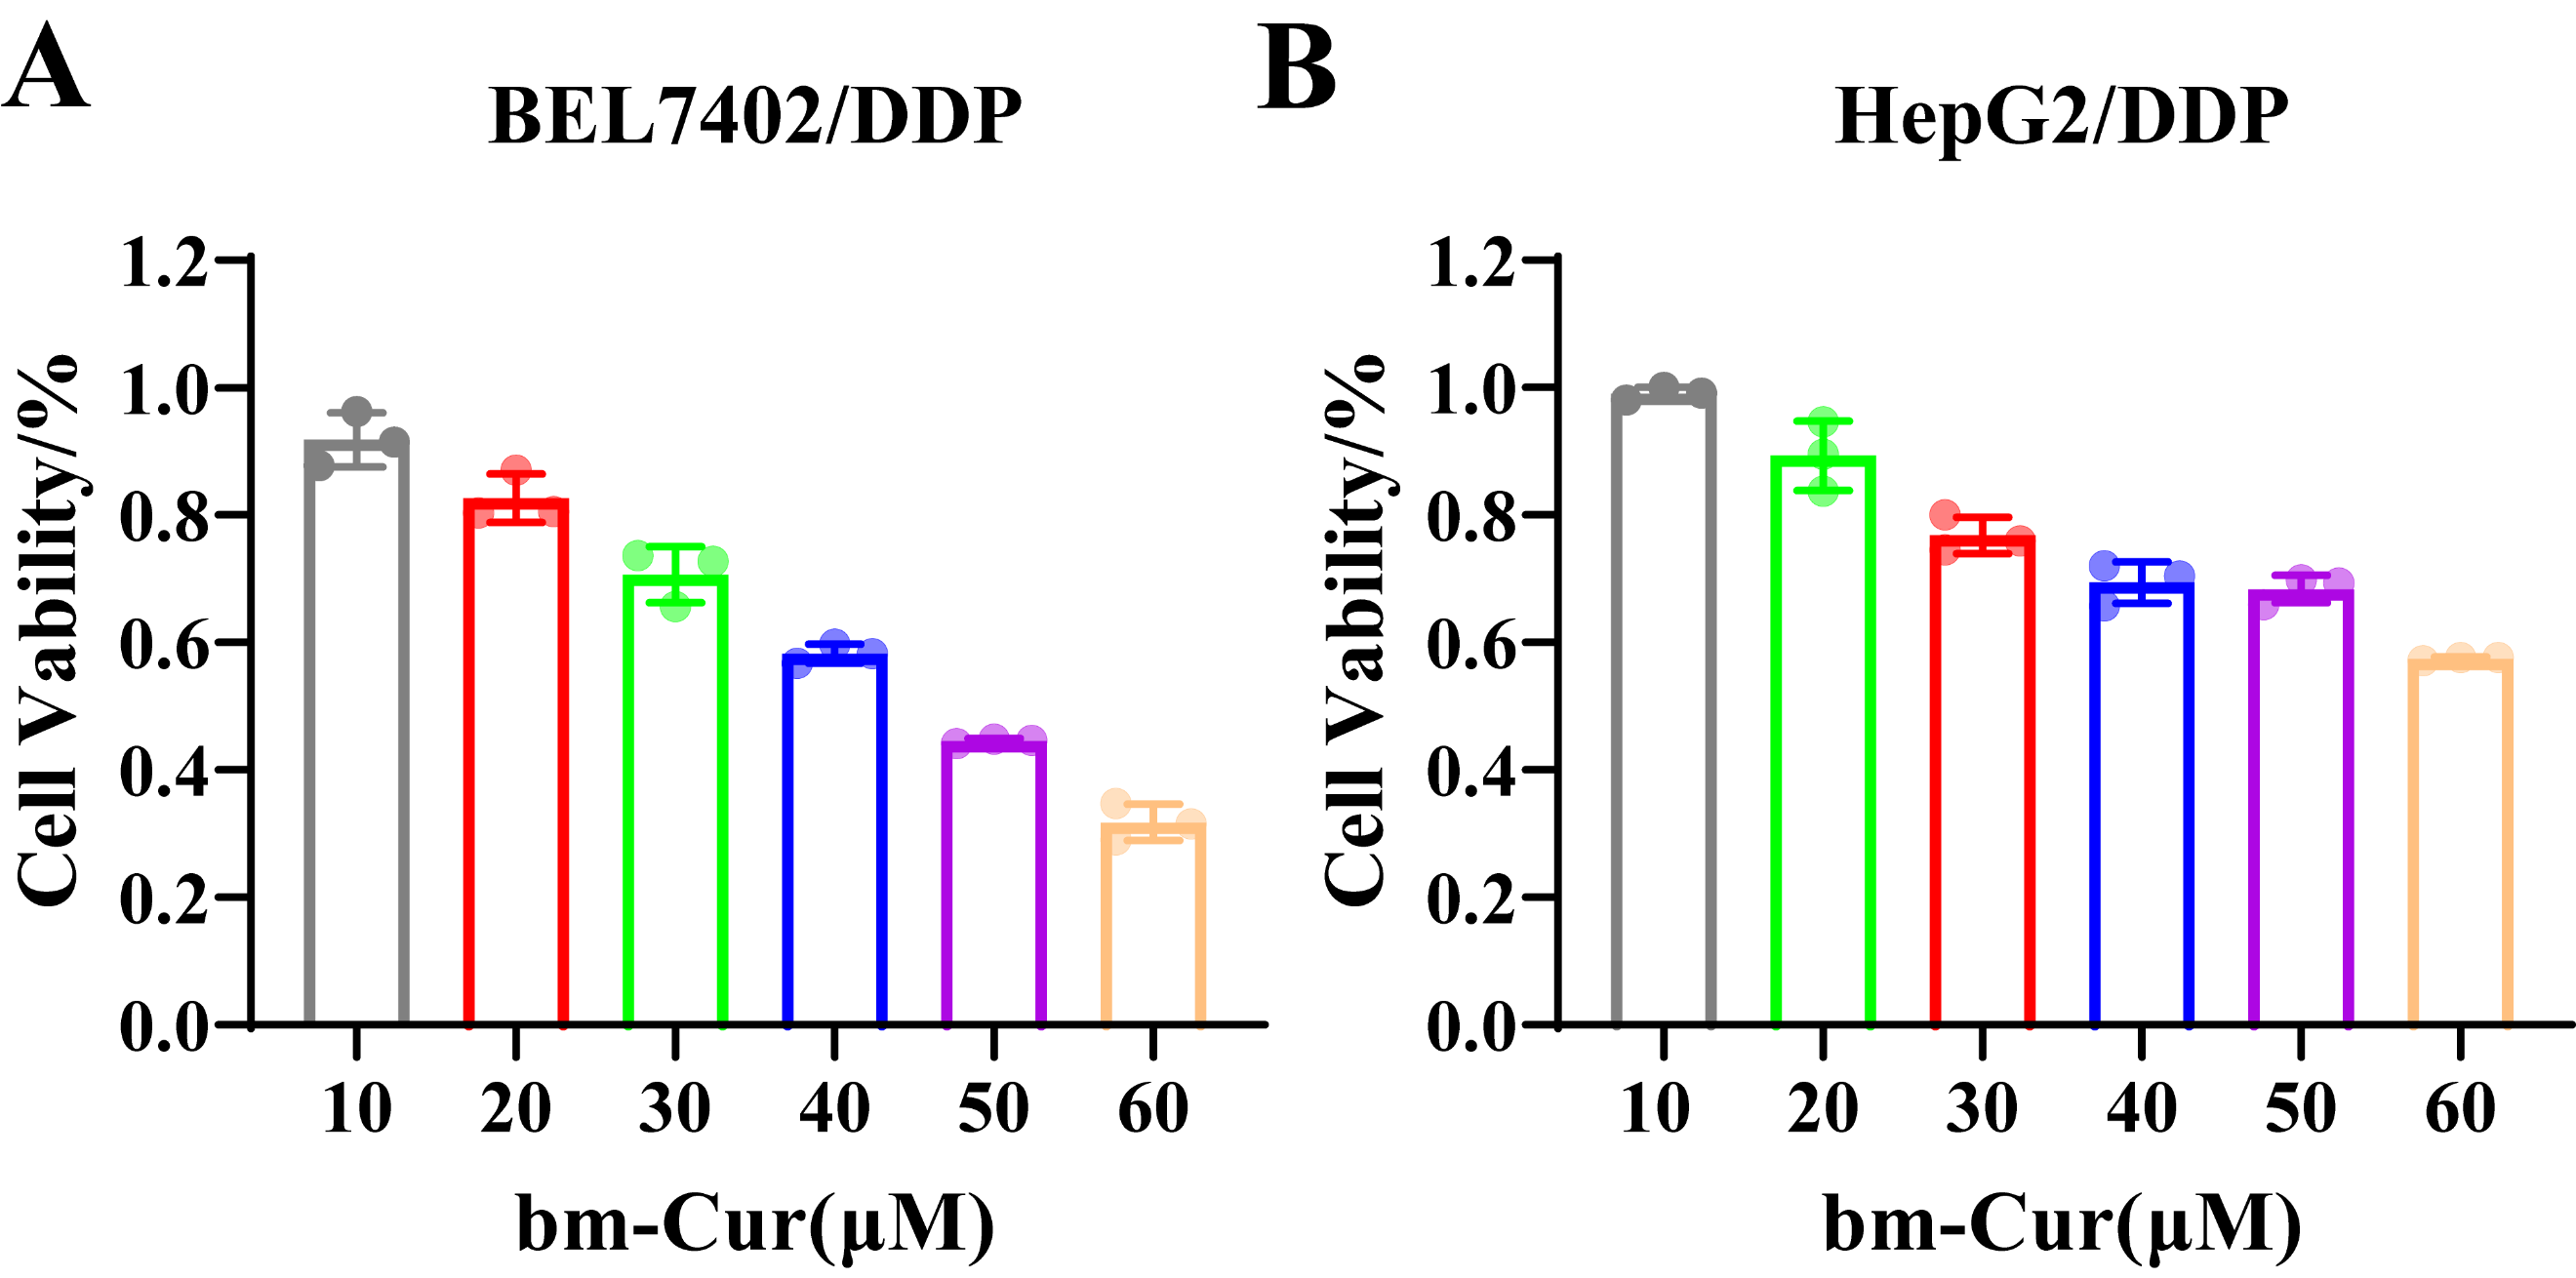


**Fig. S6.** Cytotoxicity of bm–Cur on cisplatin-resistant hepatocellular carcinoma cells. (A-B) The cell viability of Hepatocellular carcinoma cisplatin-resistant cells (BEL7402/DDP and HepG2/DDP cells) treated with different concentrations of bm–Cur for 48 h. (n ≥ 3; error bars represent SD, *P ≤ 0.05; **P ≤ 0.01; ***P ≤ 0.001; ****P ≤ 0.0001).


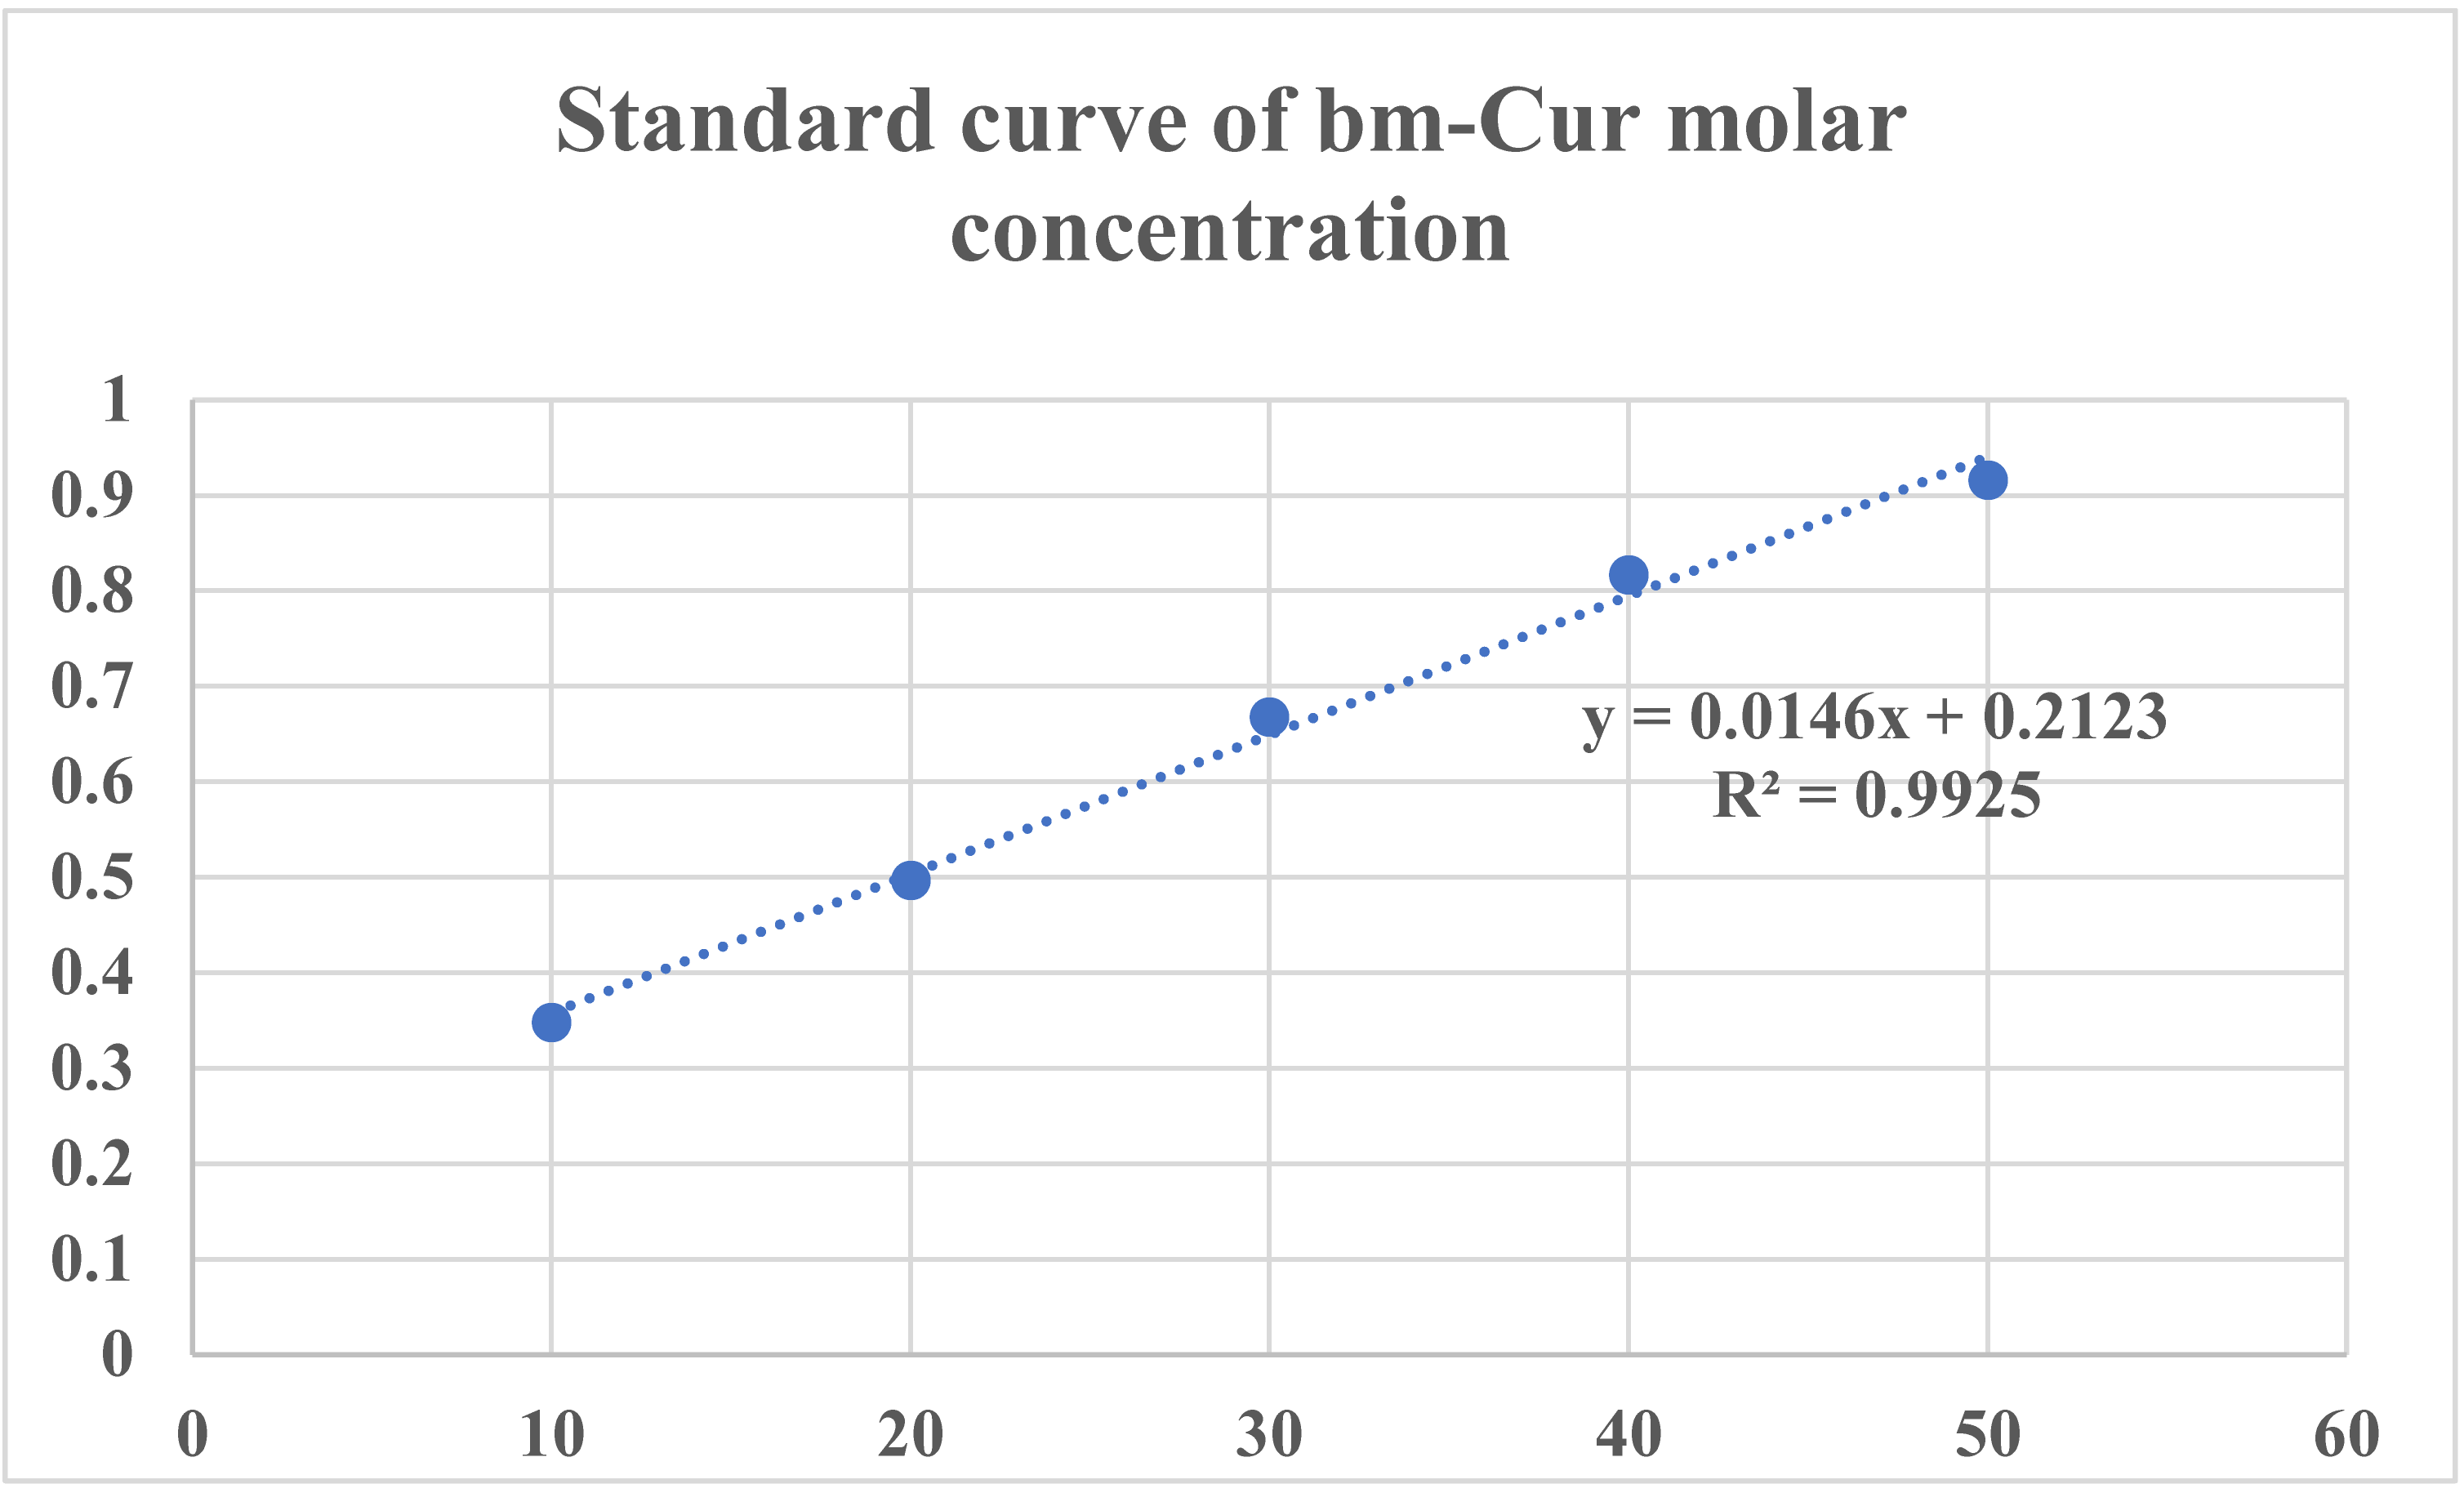


**Fig. S7.** Concentration standard curve of bm–Cur and the amount of bm–Cur in bCCM. Releasing bm–Cur (μM) = [A430 (30 μg/mL bCCM + 10mM GSH, 2 h)-0.2123]/0.0146 = 39.22.


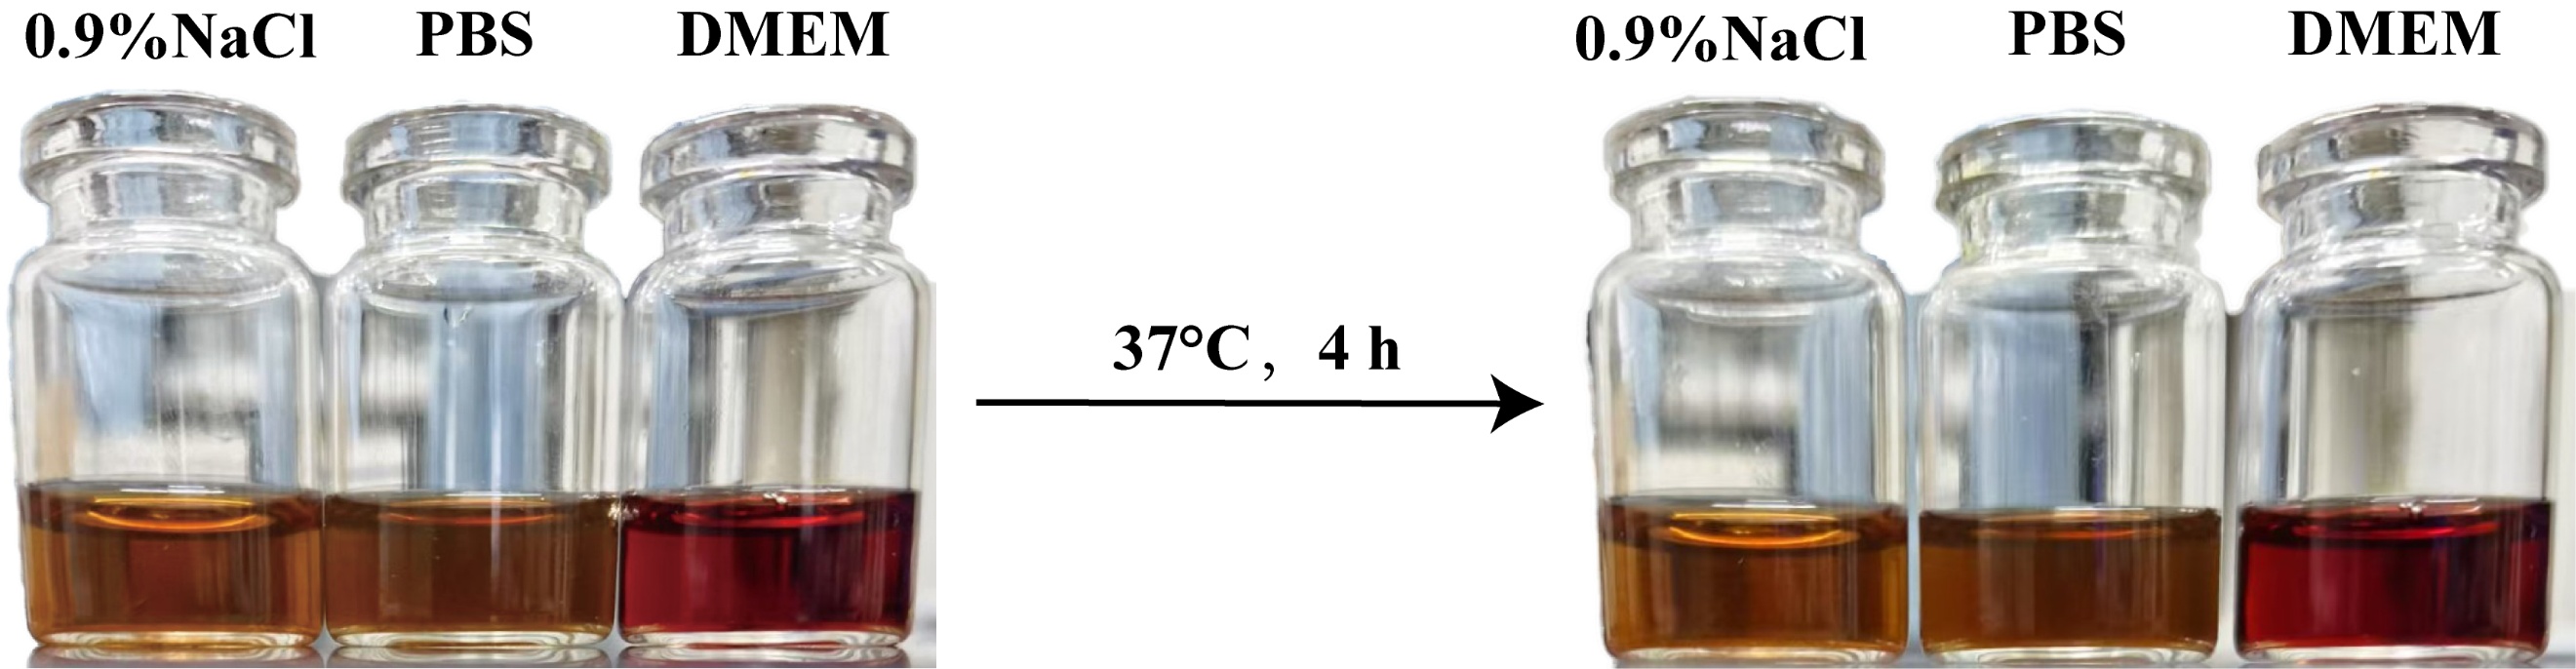


**Fig. S8.** Stability test of bCCM in various solutions.


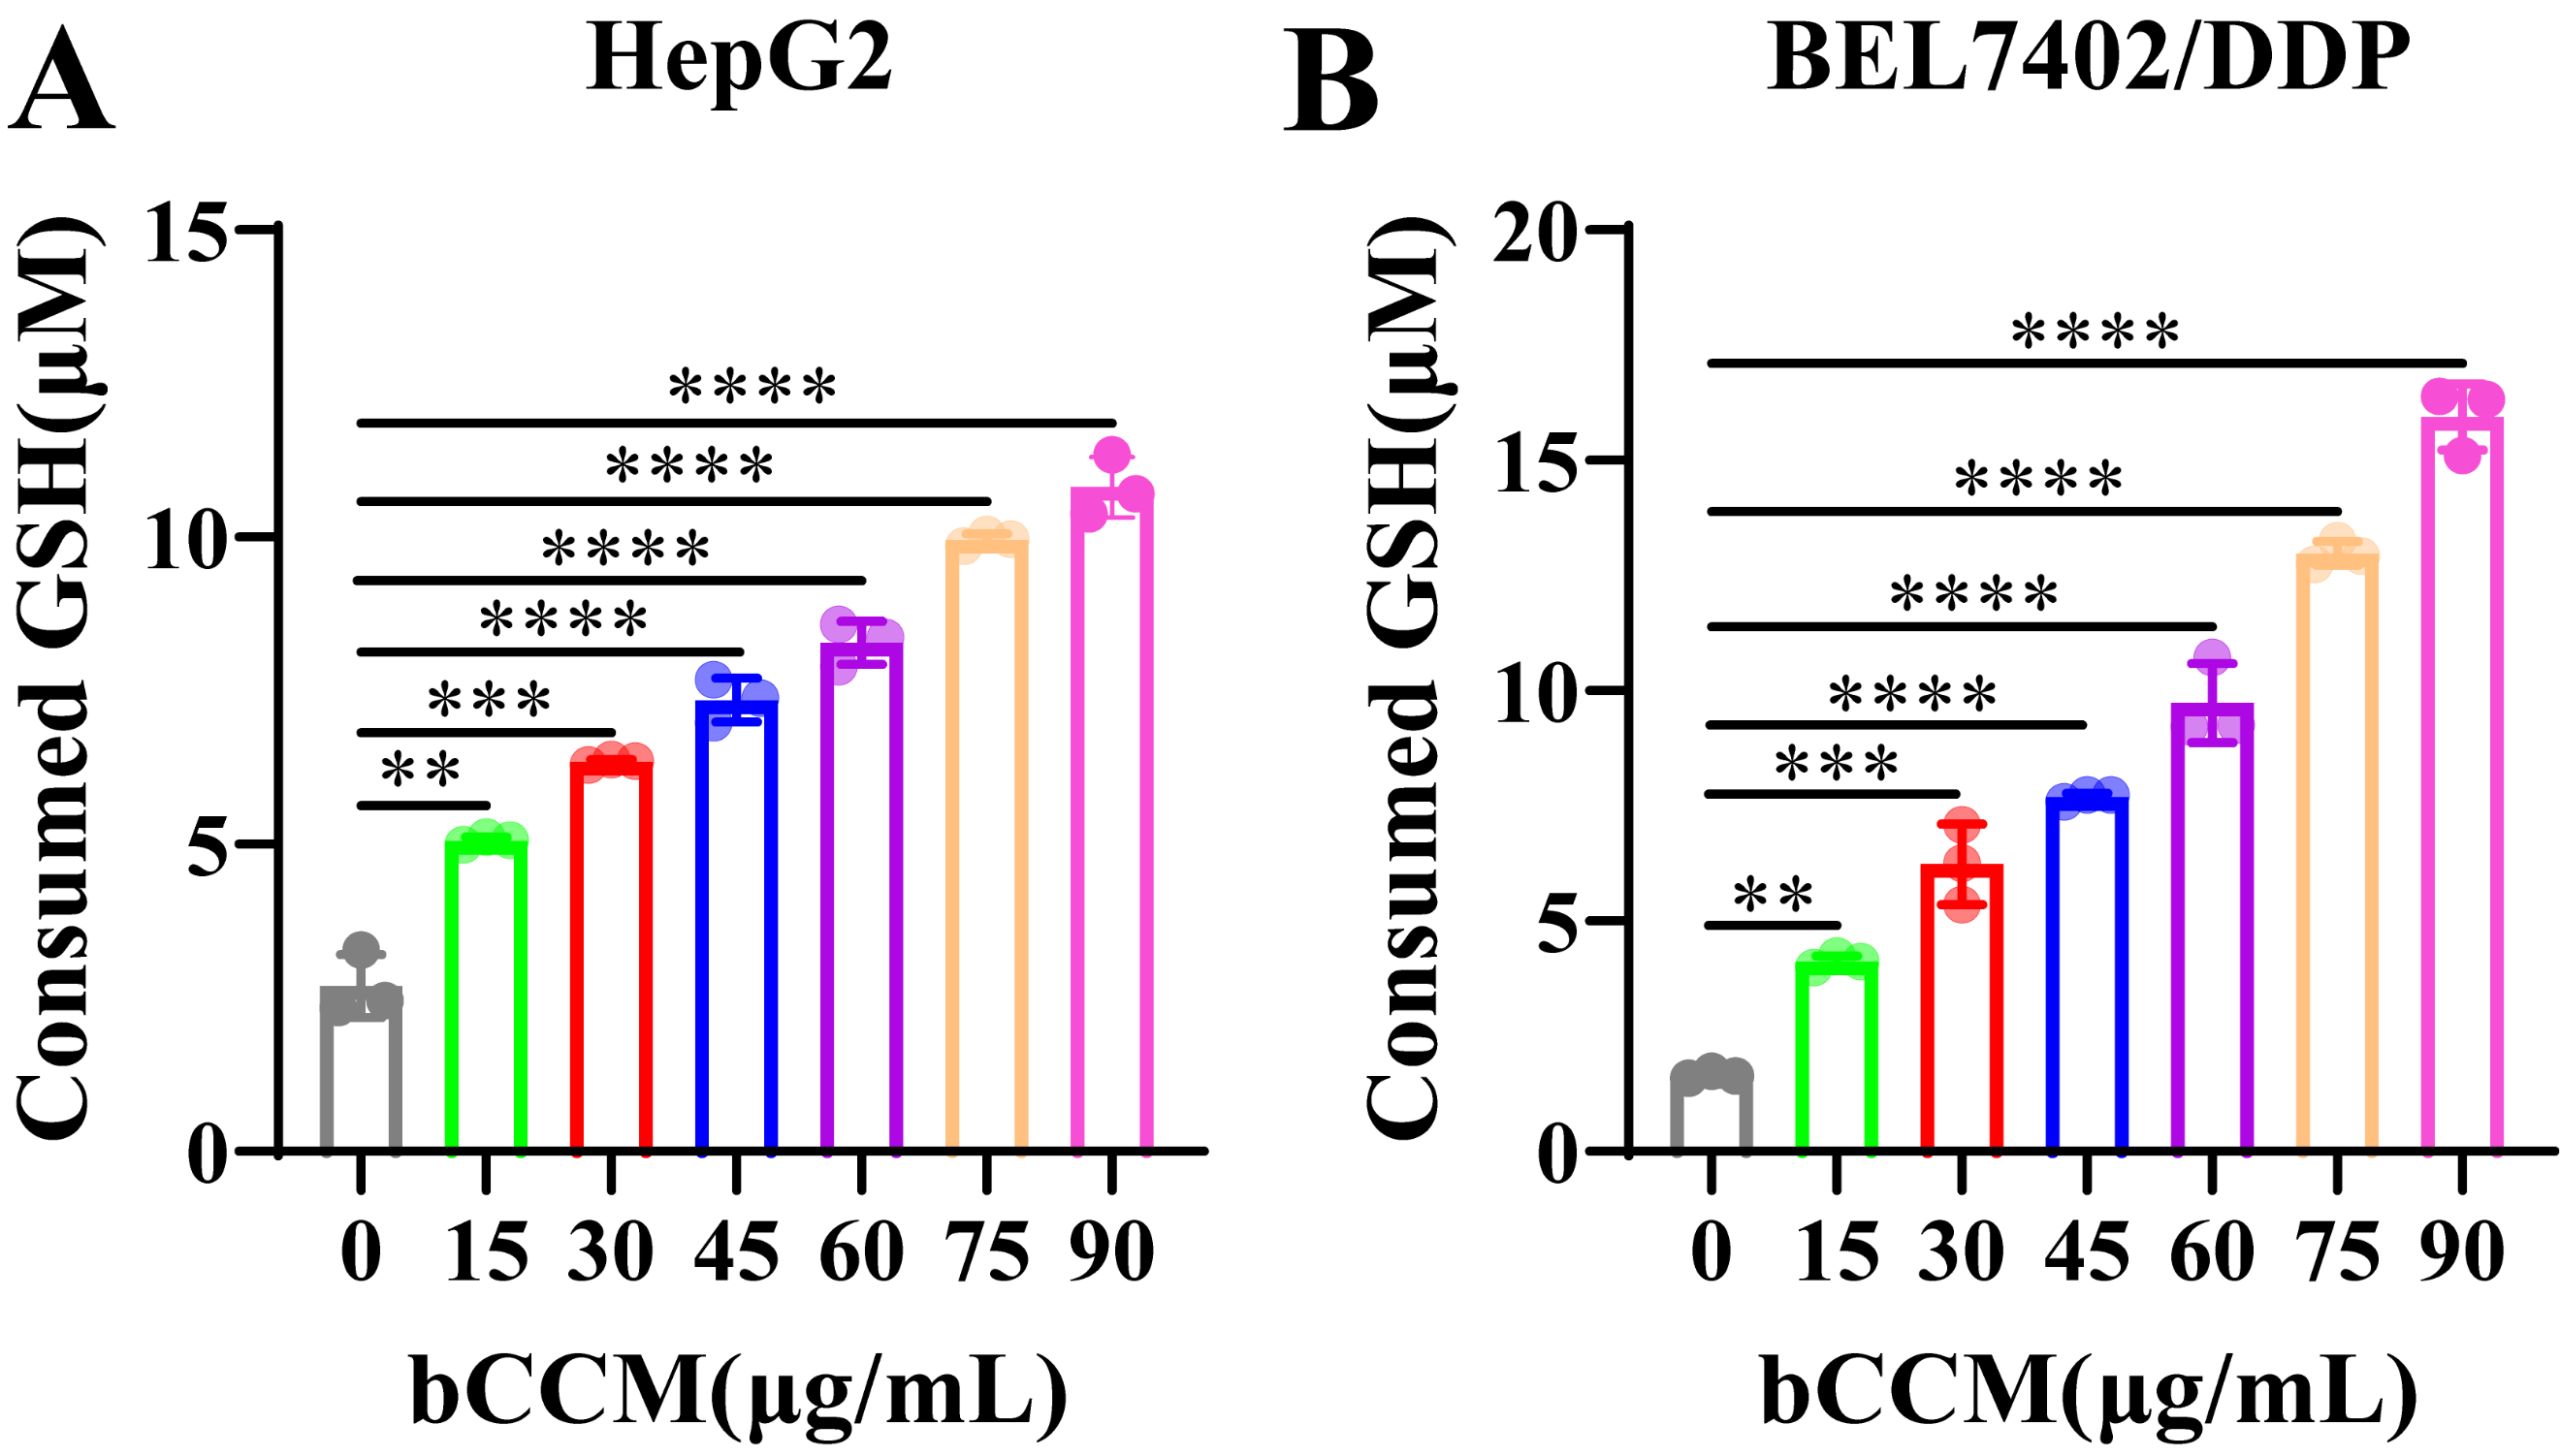


**Fig. S9.** GSH consumption capacity test of **bCCM**. (A-B) The consumed GSH of HepG2 and BEL7402/DDP cells treated with different concentrations of bCCM for 24 h. (n ≥ 3; error bars represent SD, *P ≤ 0.05; **P ≤ 0.01; ***P ≤ 0.001; ****P ≤ 0.0001)


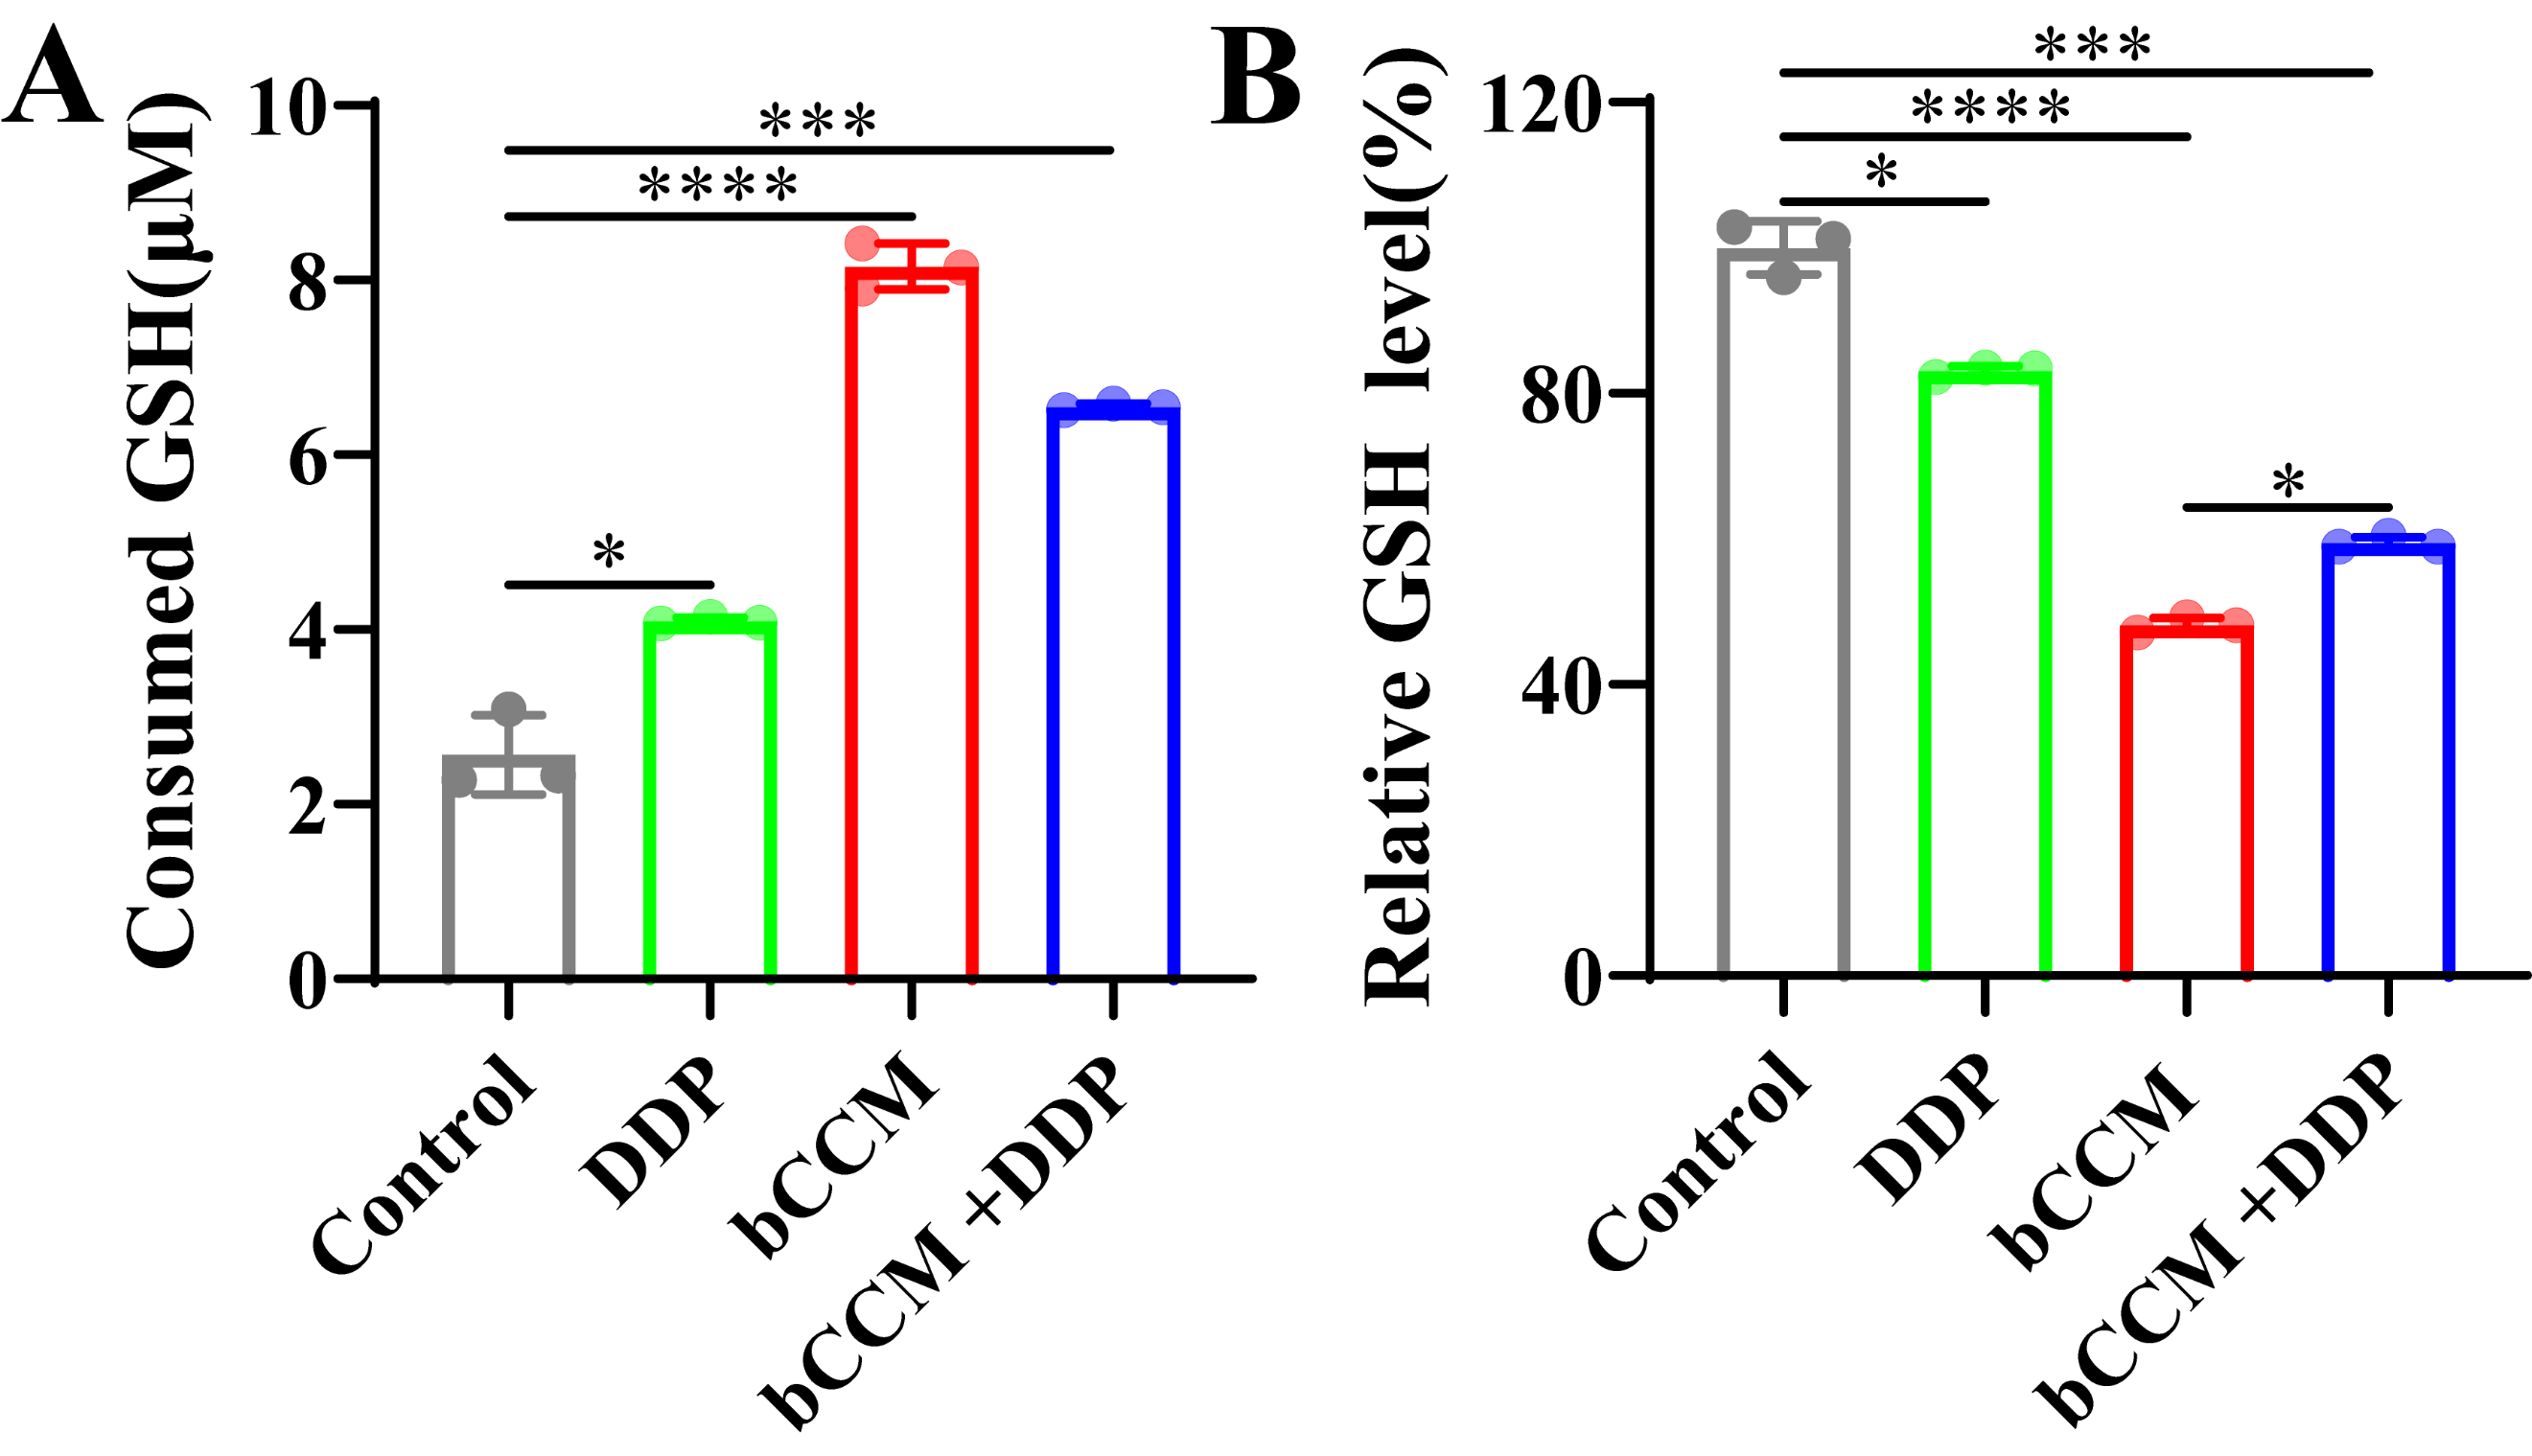


**Fig. S10.** Detection of GSH levels with different treatments on HepG2 cells. (A) The consumed GSH and (B) relative GSH level treated with different groups for 24 h. (n ≥ 3; error bars represent SD, *P ≤ 0.05; **P ≤ 0.01; ***P ≤ 0.001; ****P ≤ 0.0001).


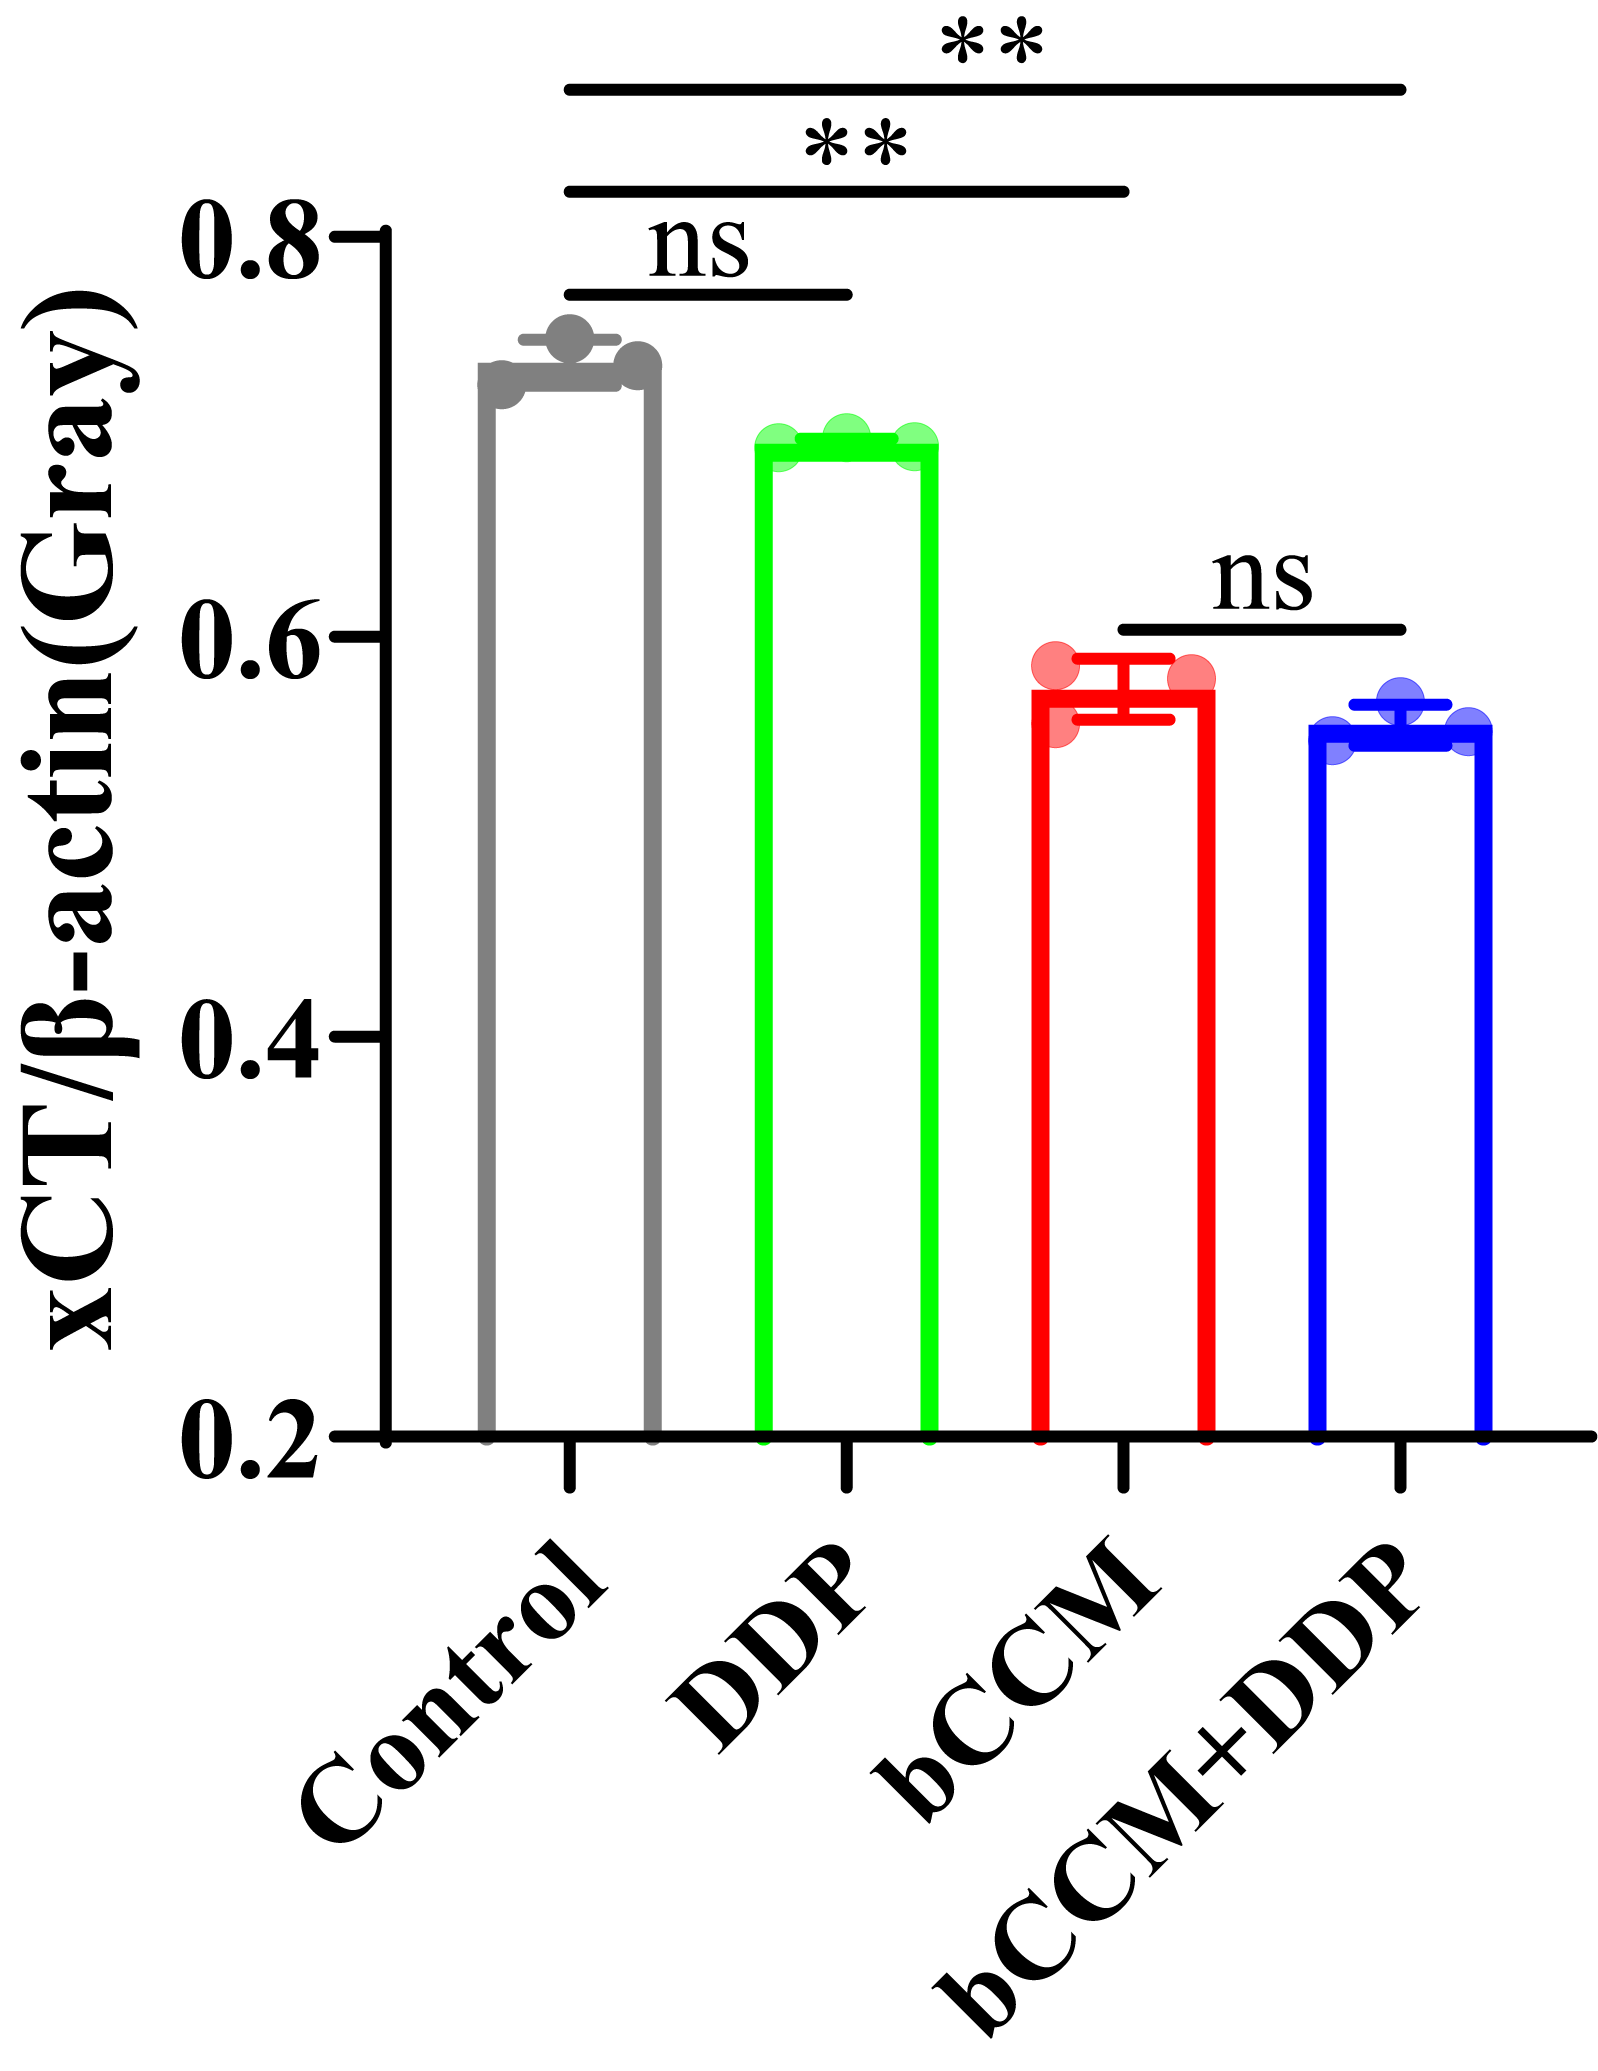


**Fig. S11.** Quantification of xCT protein in BEL7402/DDP cells treated with different groups for 24 h. (n ≥ 3; error bars represent SD, *P ≤ 0.05; **P ≤ 0.01; ***P ≤ 0.001; ****P ≤ 0.0001).

Table. S1. IC50 for different cells with different administrations (mean±SD, n=3)

| **IC50** | **bCCM (μg/mL)** | **DDP (μM)** |
| --- | --- | --- |
| HepG2 | 29.1±0.6 | 11.3±0.2 |
| BEL7402/DDP | 65.4±1.2 | 47.2±0.9 |
| A2780/DDP | 40.2±0.6 | 66.4±1.7 |

**Fig. S12.** The cell viability of AML-12 with treatment of different bCCM concentrations for 24 h. (n ≥ 3; error bars represent SD, *P ≤ 0.05; **P ≤ 0.01; ***P ≤ 0.001; ****P ≤ 0.0001).


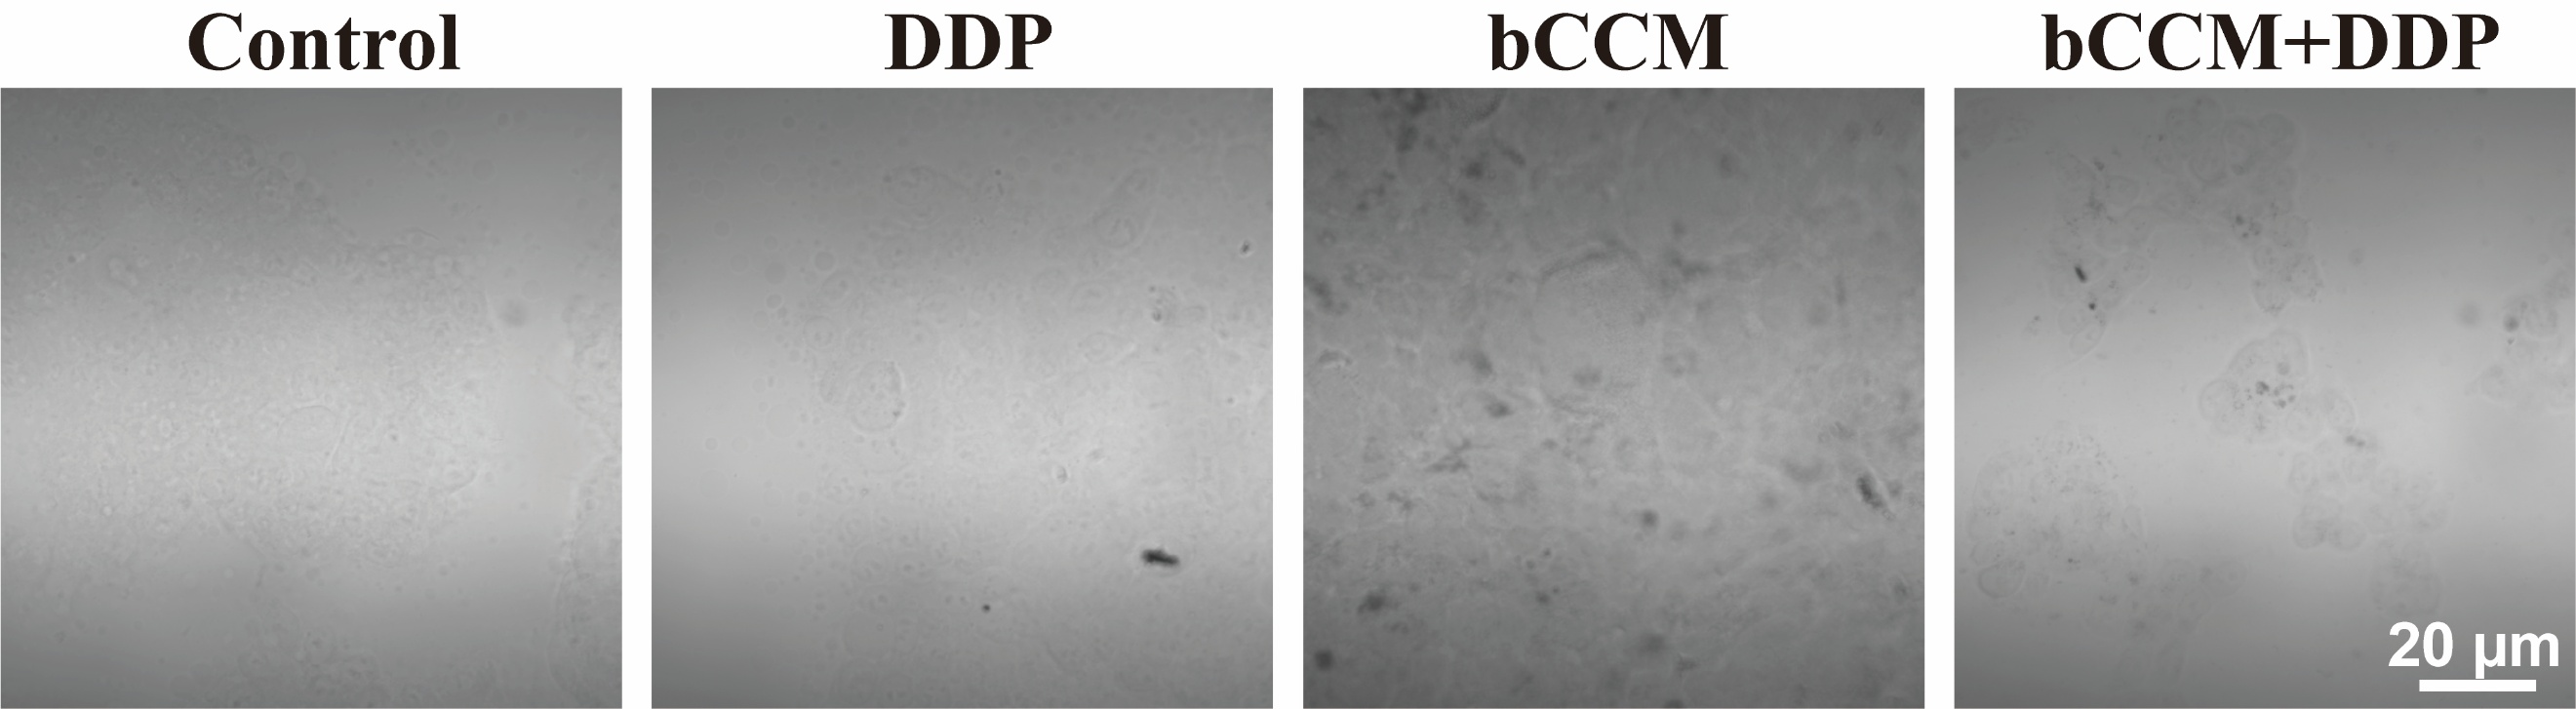


**Fig. S13.** Bright field image of BEL7402/DDP cells for Live/dead staining.


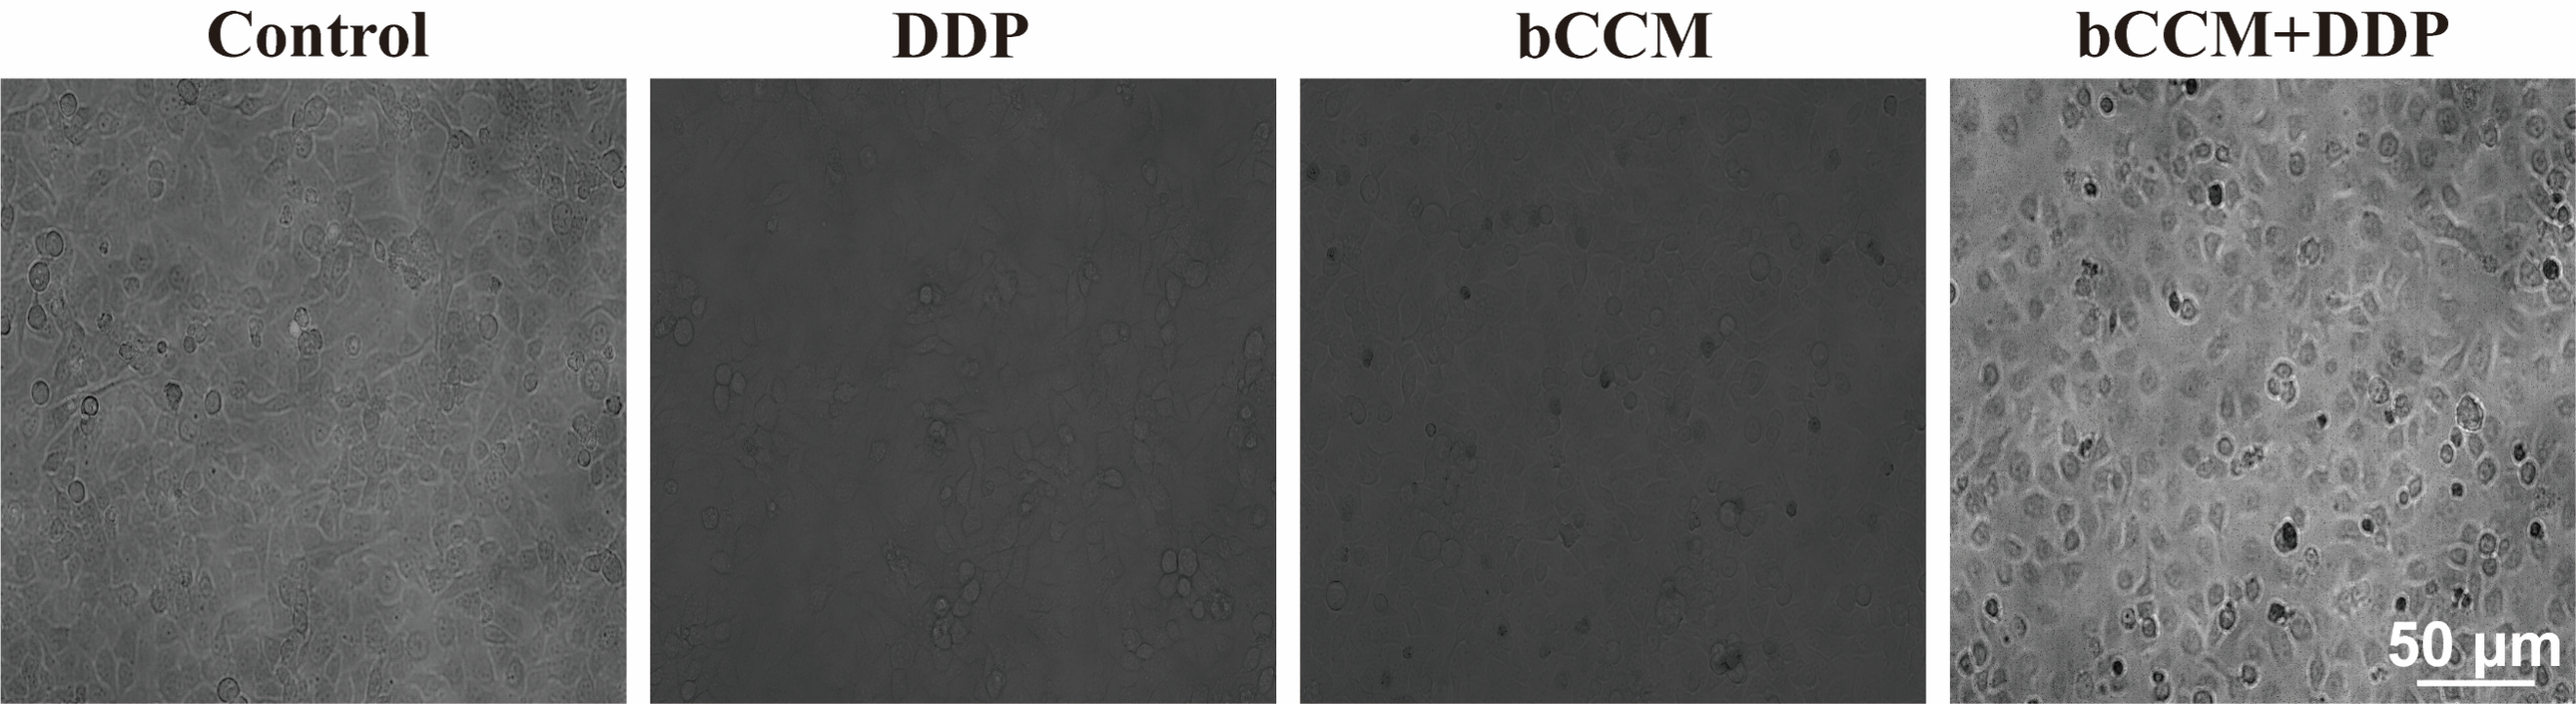


**Fig. S14.** Bright field image of BEL7402/DDP cells for apoptosis.


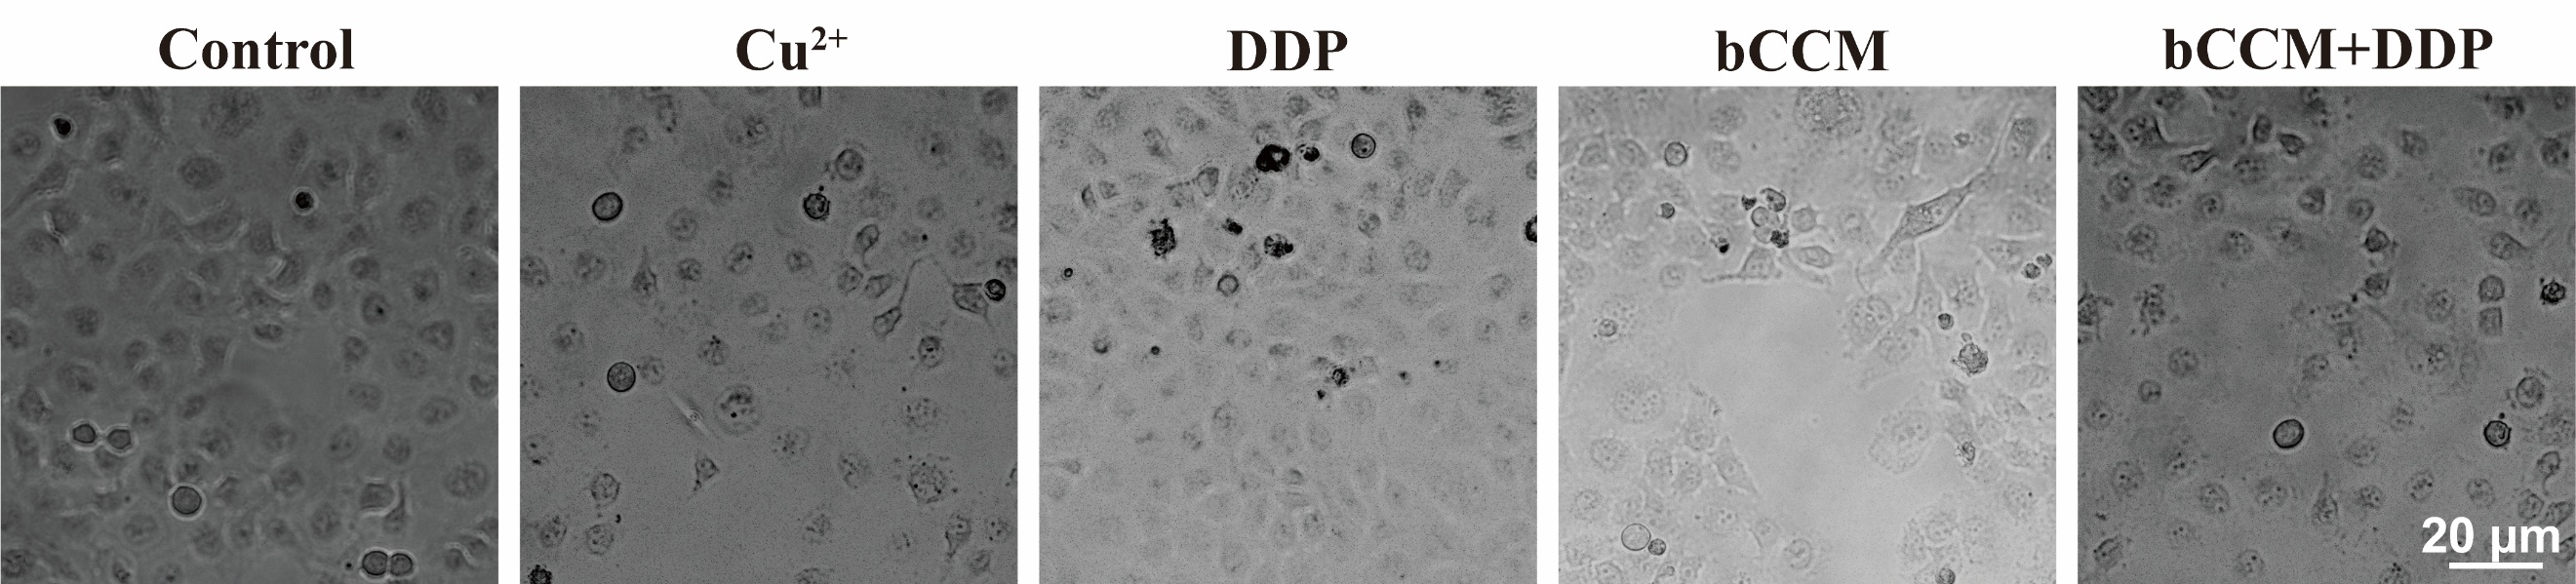


**Fig. S15.** Bright field image of BEL7402/DDP cells for intracellular copper ions.

**Fig. S16.** Cytotoxicity of copper ions on BEL7402/DDP cells. The cell viability of BEL7402/DDP cells treated with different concentrations of copper ions for 24 h.

**Fig. S17.** Cytotoxicity of UK5099 on BEL7402/DDP cells. The cell viability of BEL7402/DDP cells treated with different concentrations of UK5099 for 24 h.


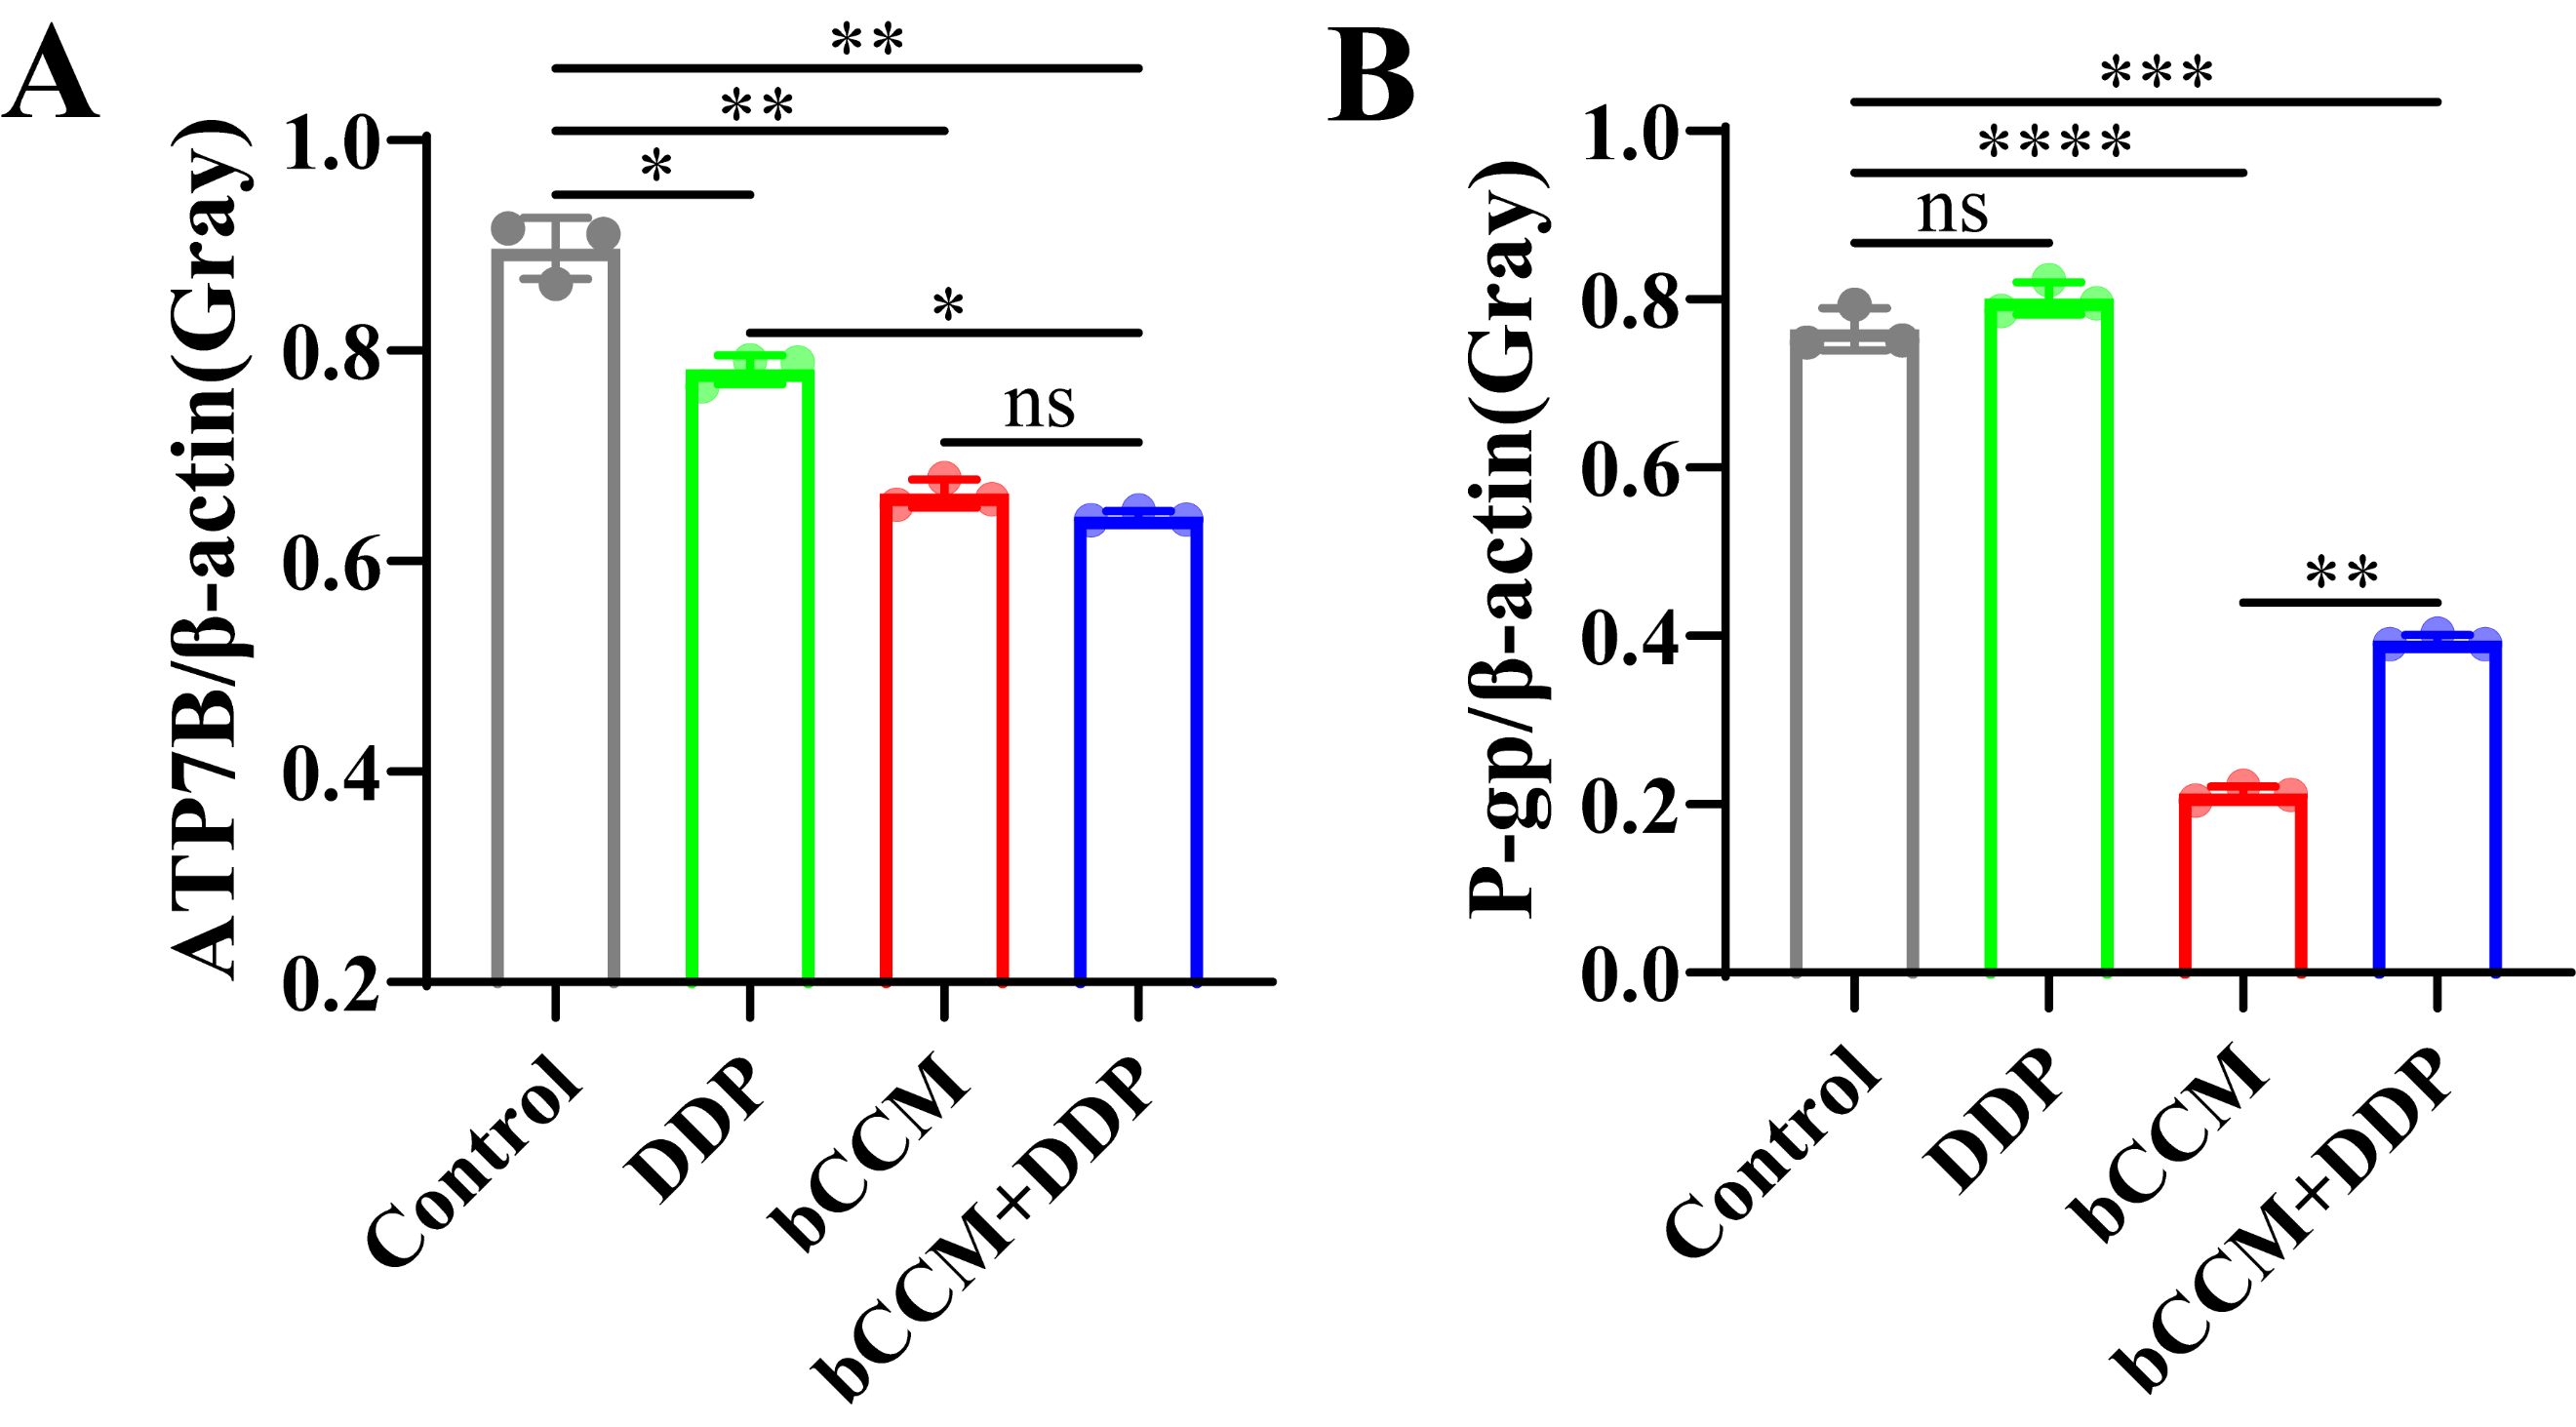


**Fig. S18.** Quantification of drug-resistant proteins (A-B) in BEL7402/DDP cells treated with different groups for 24 h. (n ≥ 3; error bars represent SD, *P ≤ 0.05; **P ≤ 0.01; ***P ≤ 0.001; ****P ≤ 0.0001).


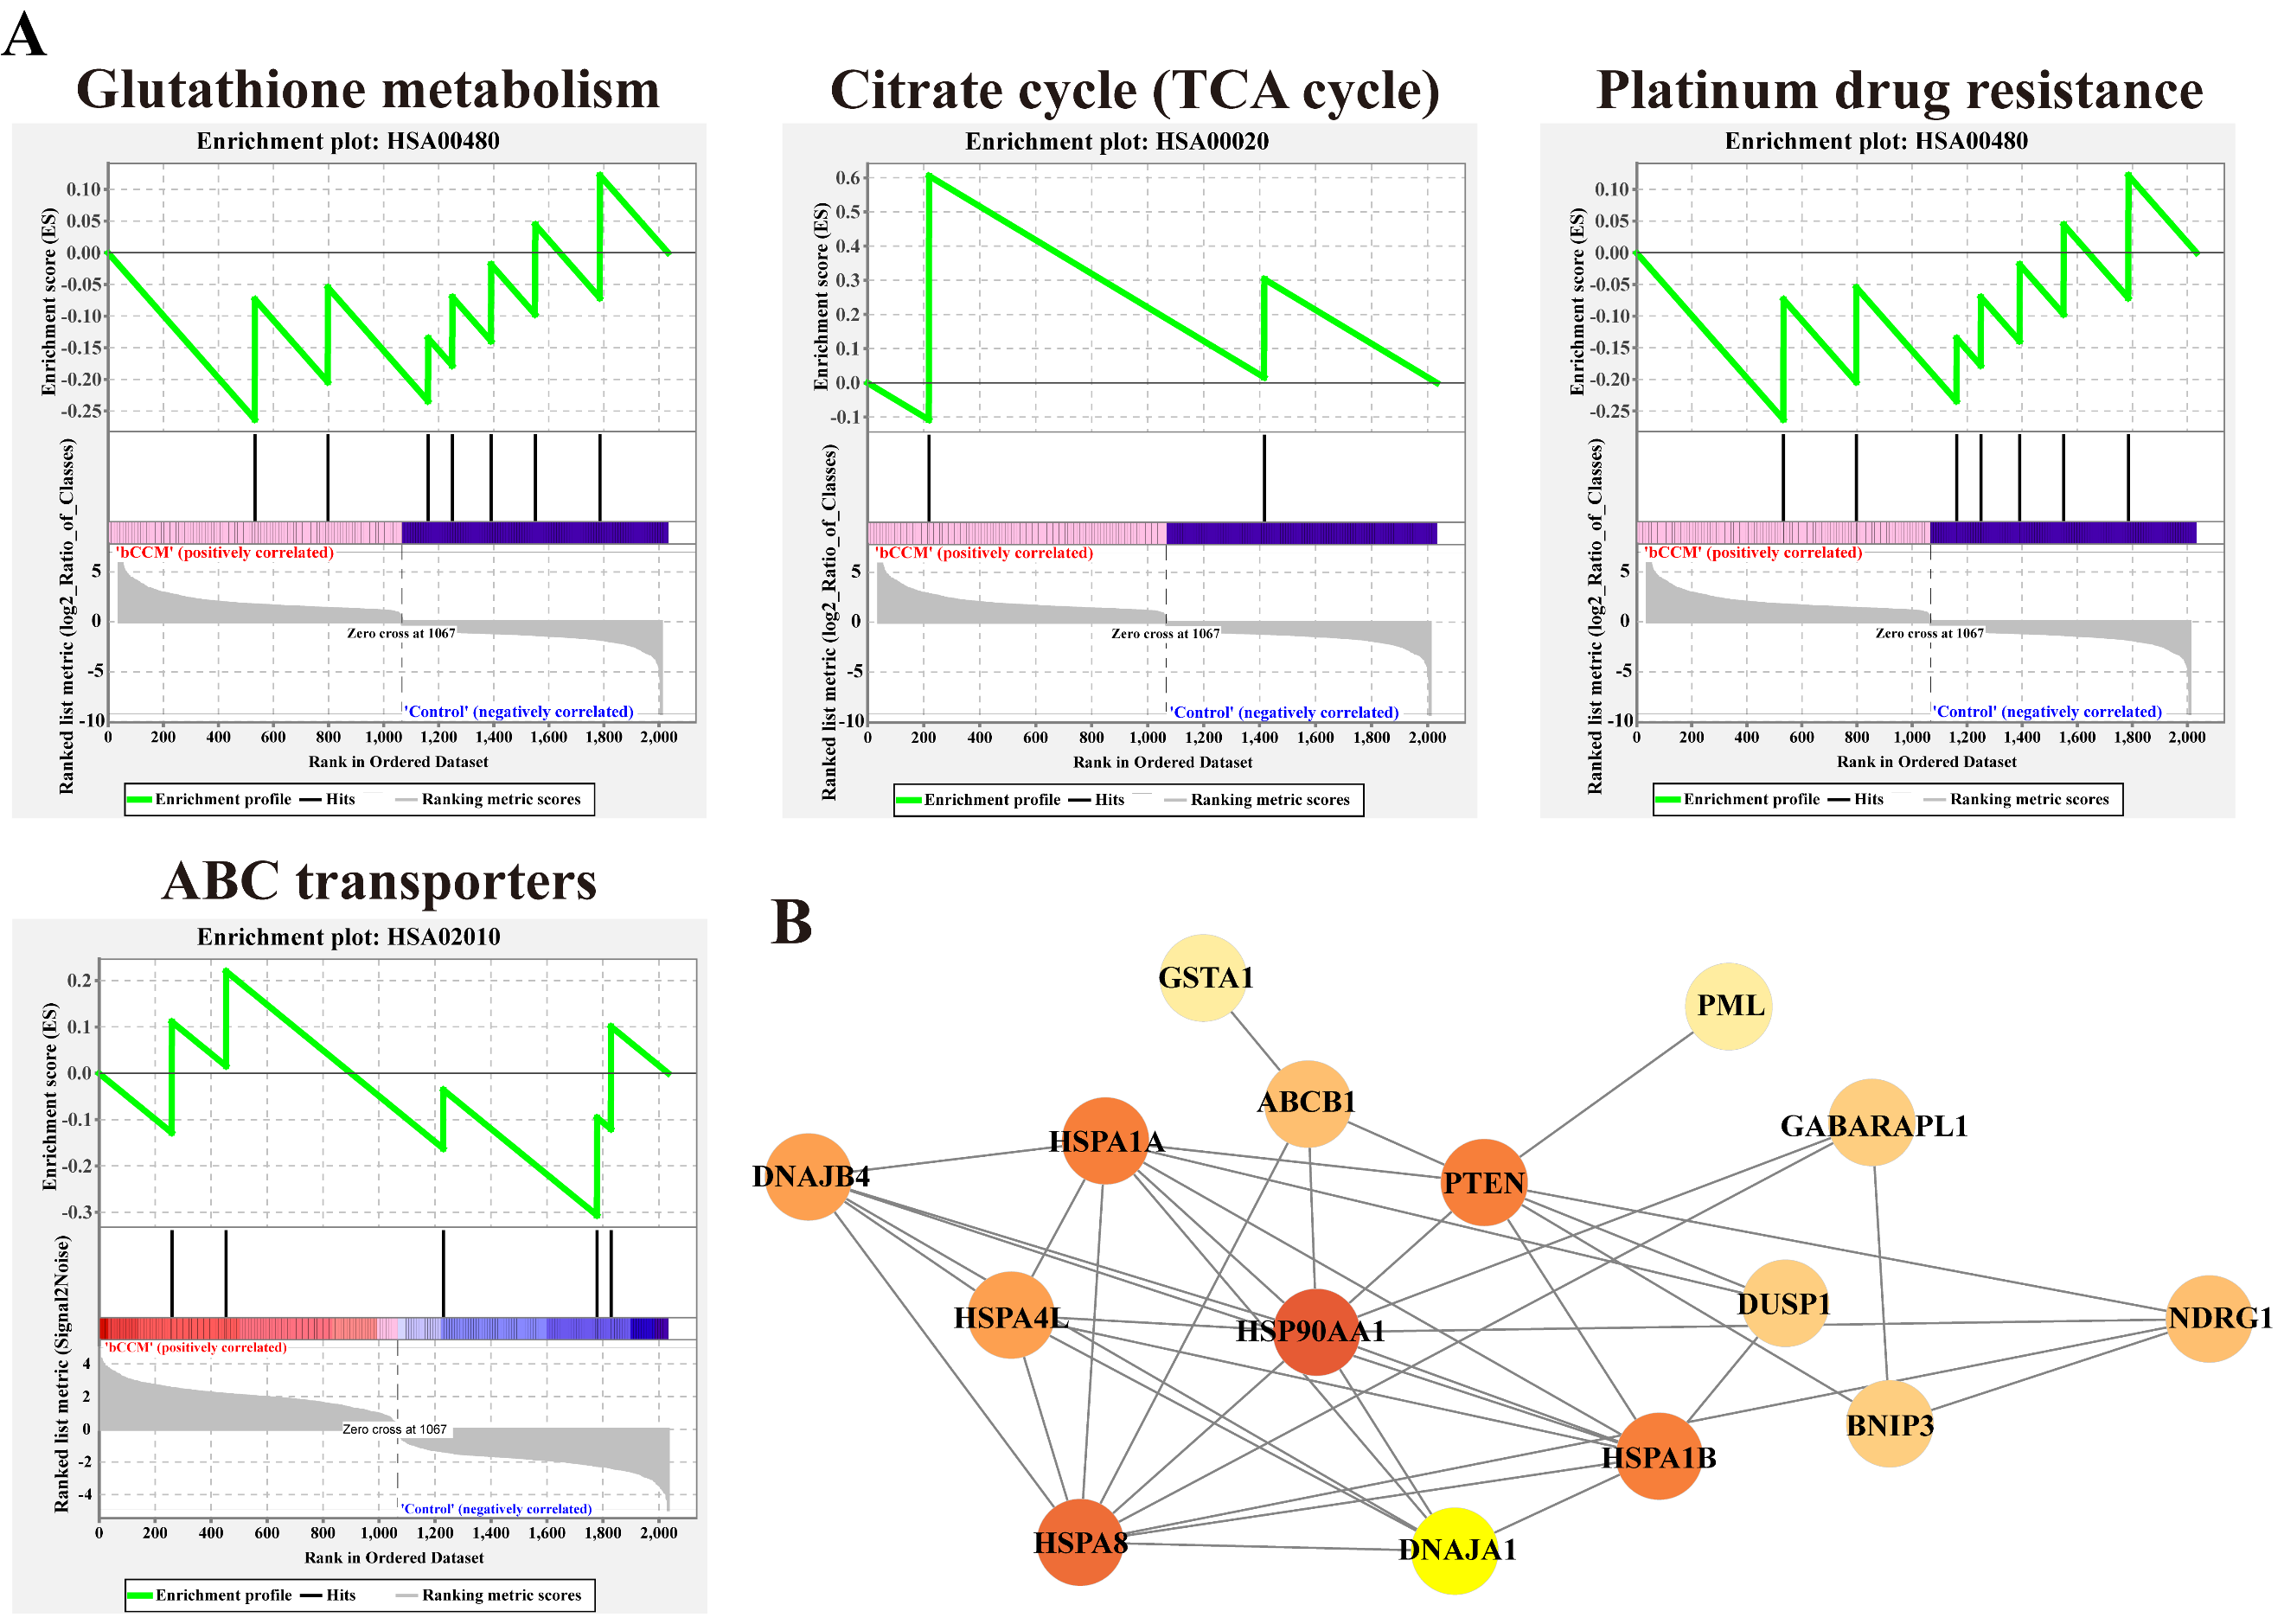


**Fig. S19.** Transcriptomics analysis of BEL7402/DDP cells post 24 h treatment with **bCCM**. (A) Gene Set Enrichment Analysis (GSEA) for Glutathione Metabolism, Citrate (TCA) cycle, Platinum drug resistance and ABC transporters pathways. (B) Protein–protein interaction (PPI) network of Cuprotosis and drug resistance.


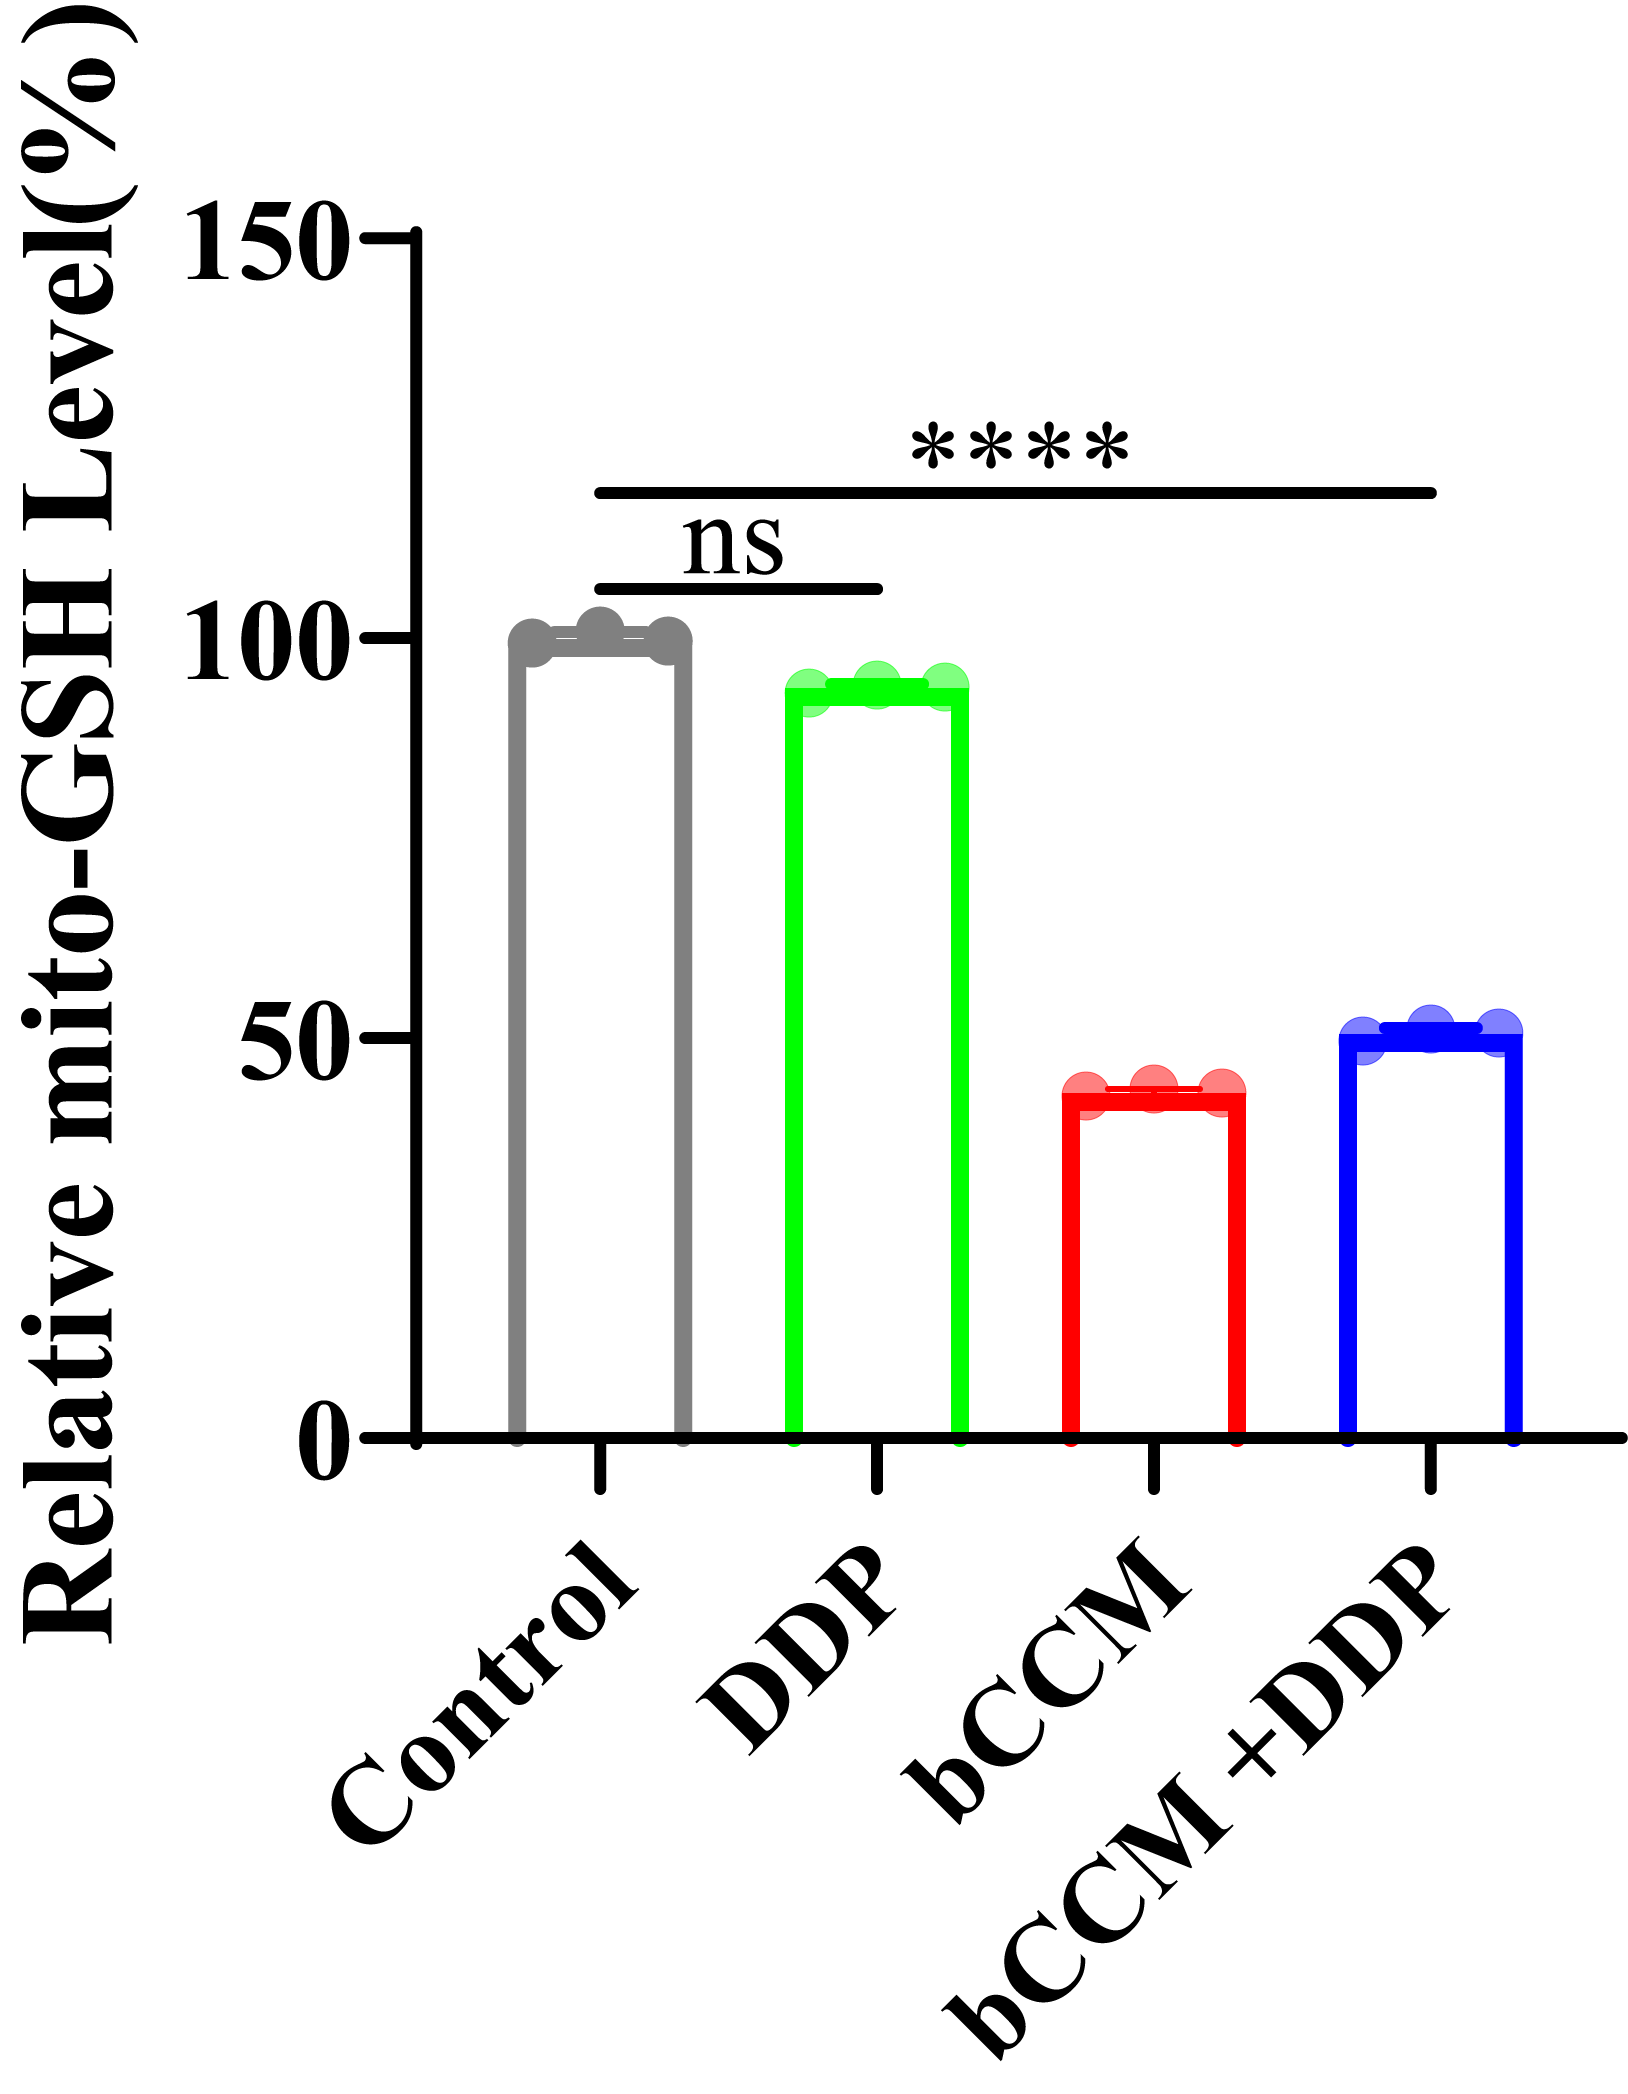


**Fig. S20.** The Relative mito-GSH level with different treatments on HepG2 cells for 24 h. (n ≥ 3; error bars represent SD, *P ≤ 0.05; **P ≤ 0.01; ***P ≤ 0.001; ****P ≤ 0.0001).


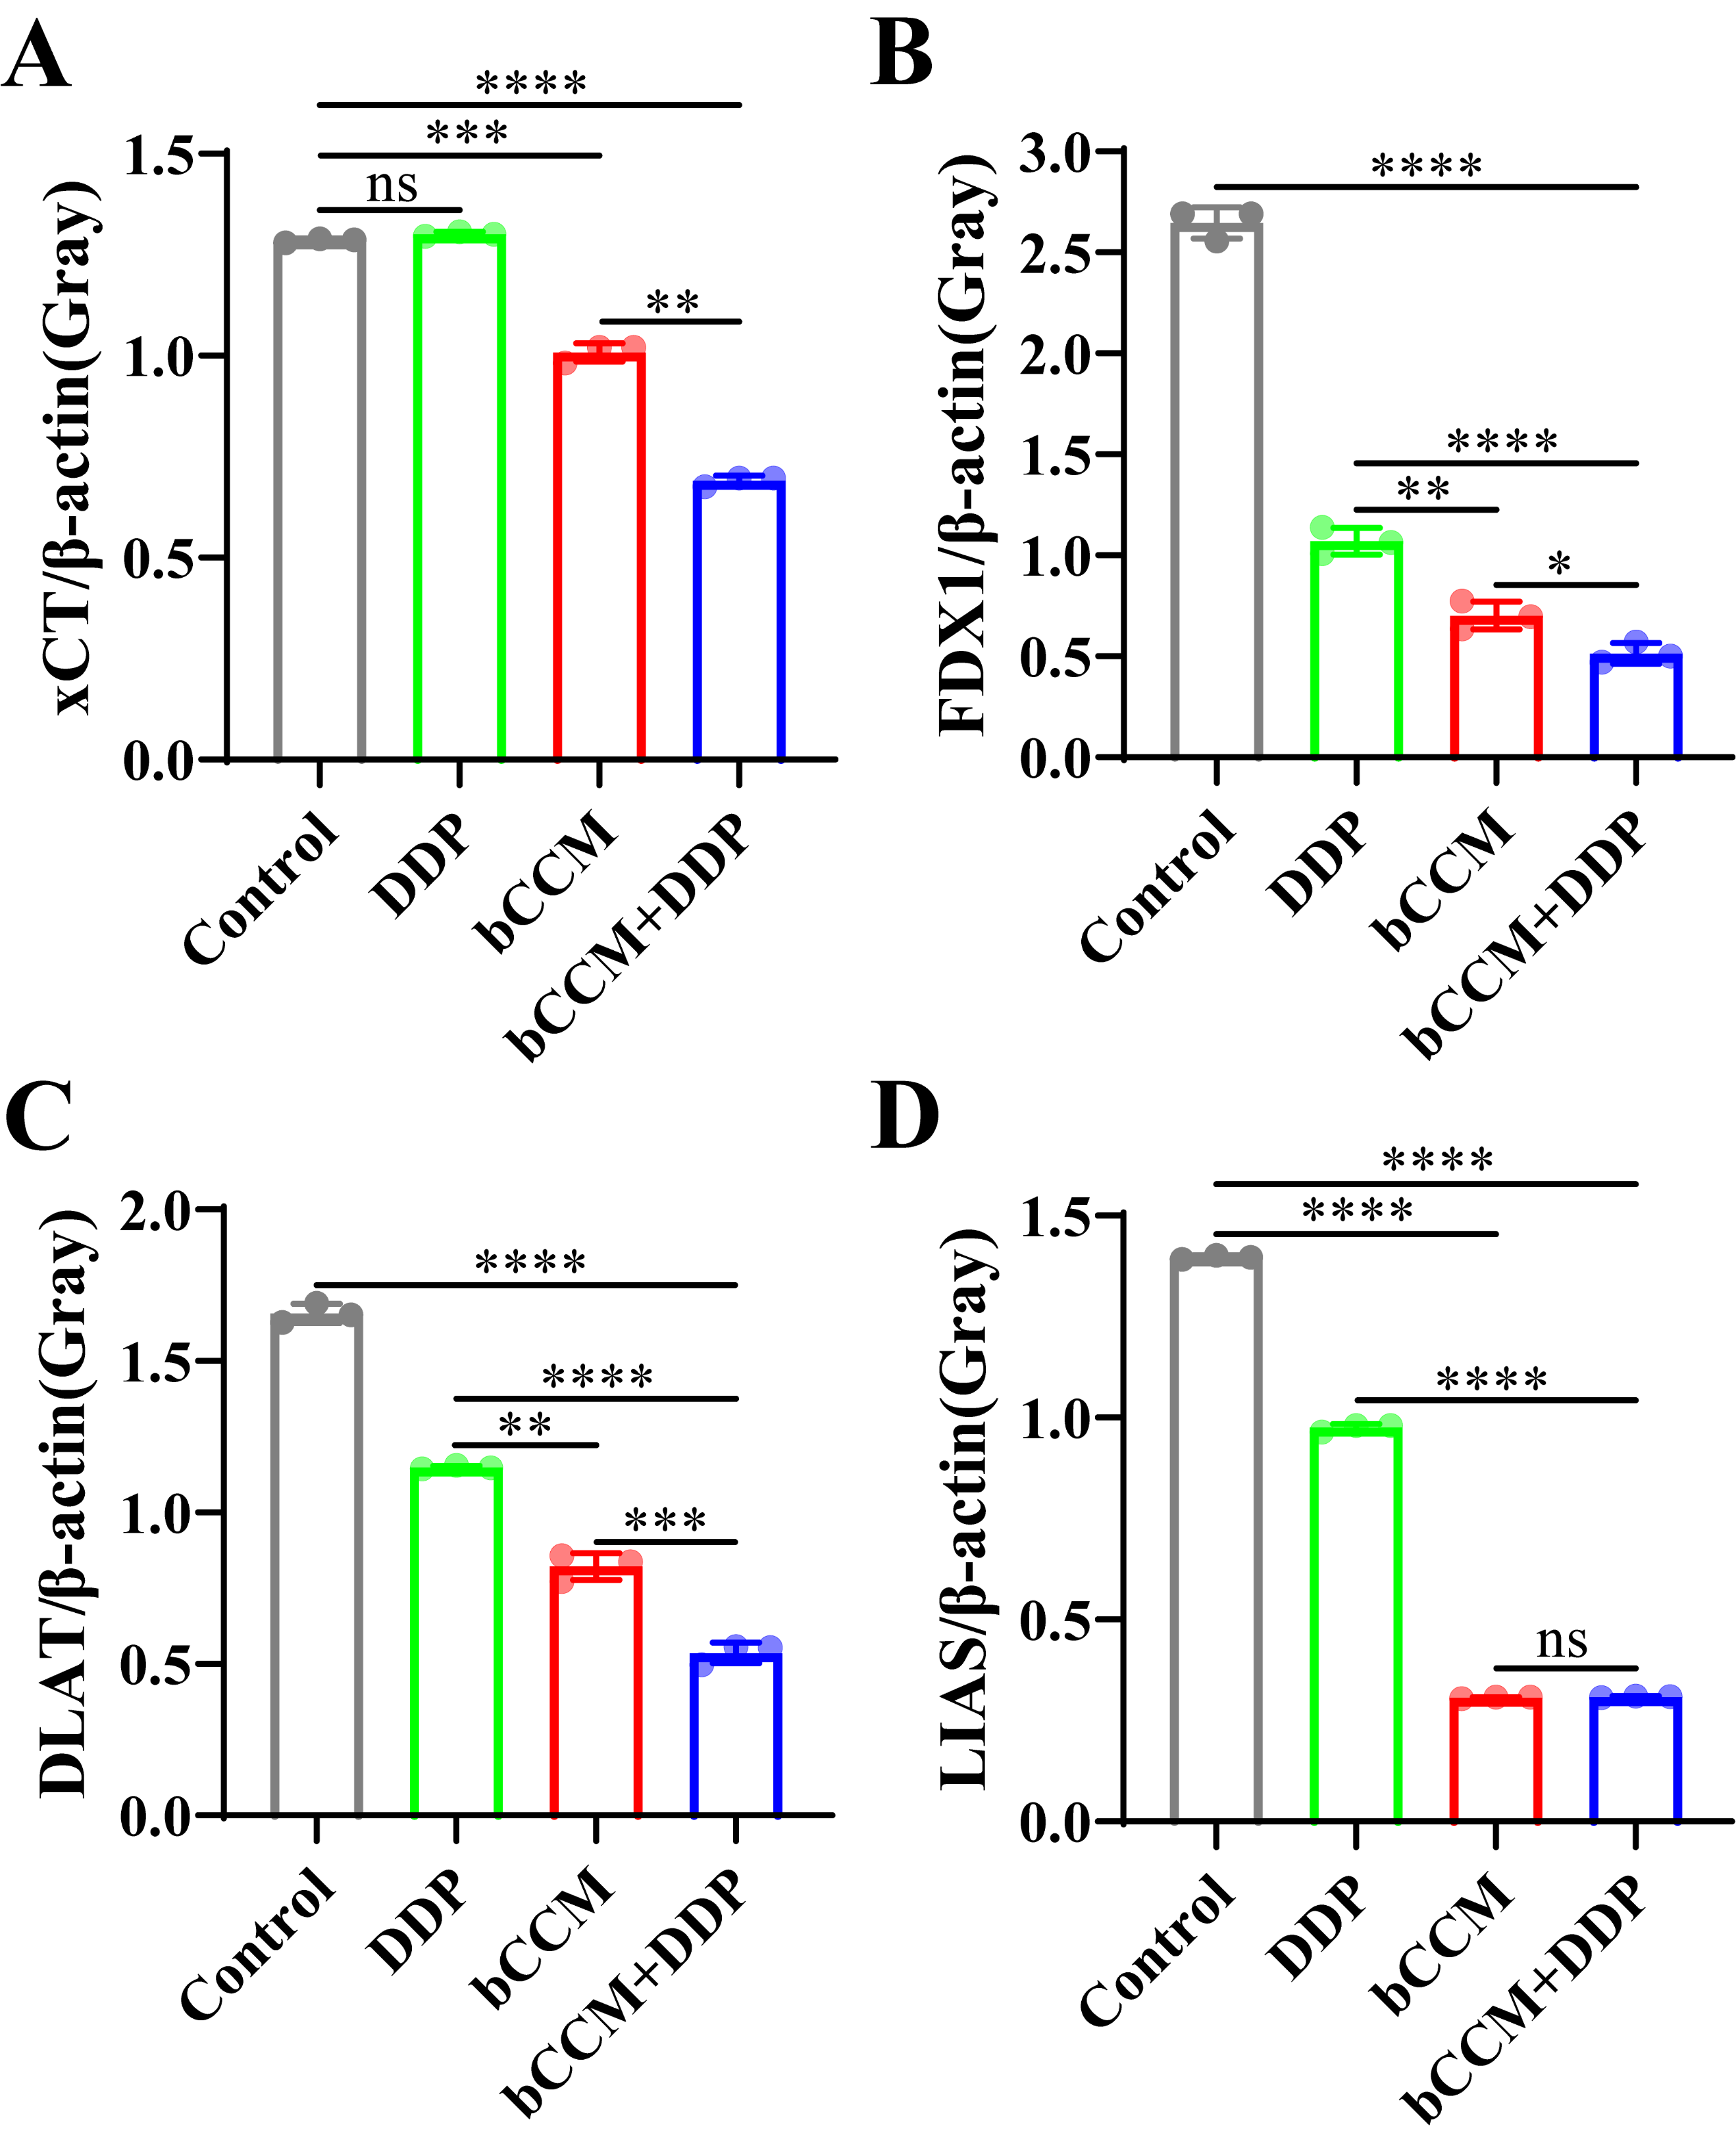


**Fig. S21.** Quantitative analysis of different proteins at the mitochondrial level. (A) Quantification of xCT in BEL7402/DDP cells treated with different groups for 24 h. (B-D) Quantification of cuproptosis-associated proteins in BEL7402/DDP cells treated with different groups for 24 h. (n ≥ 3; error bars represent SD, *P ≤ 0.05; **P ≤ 0.01; ***P ≤ 0.001; ****P ≤ 0.0001).


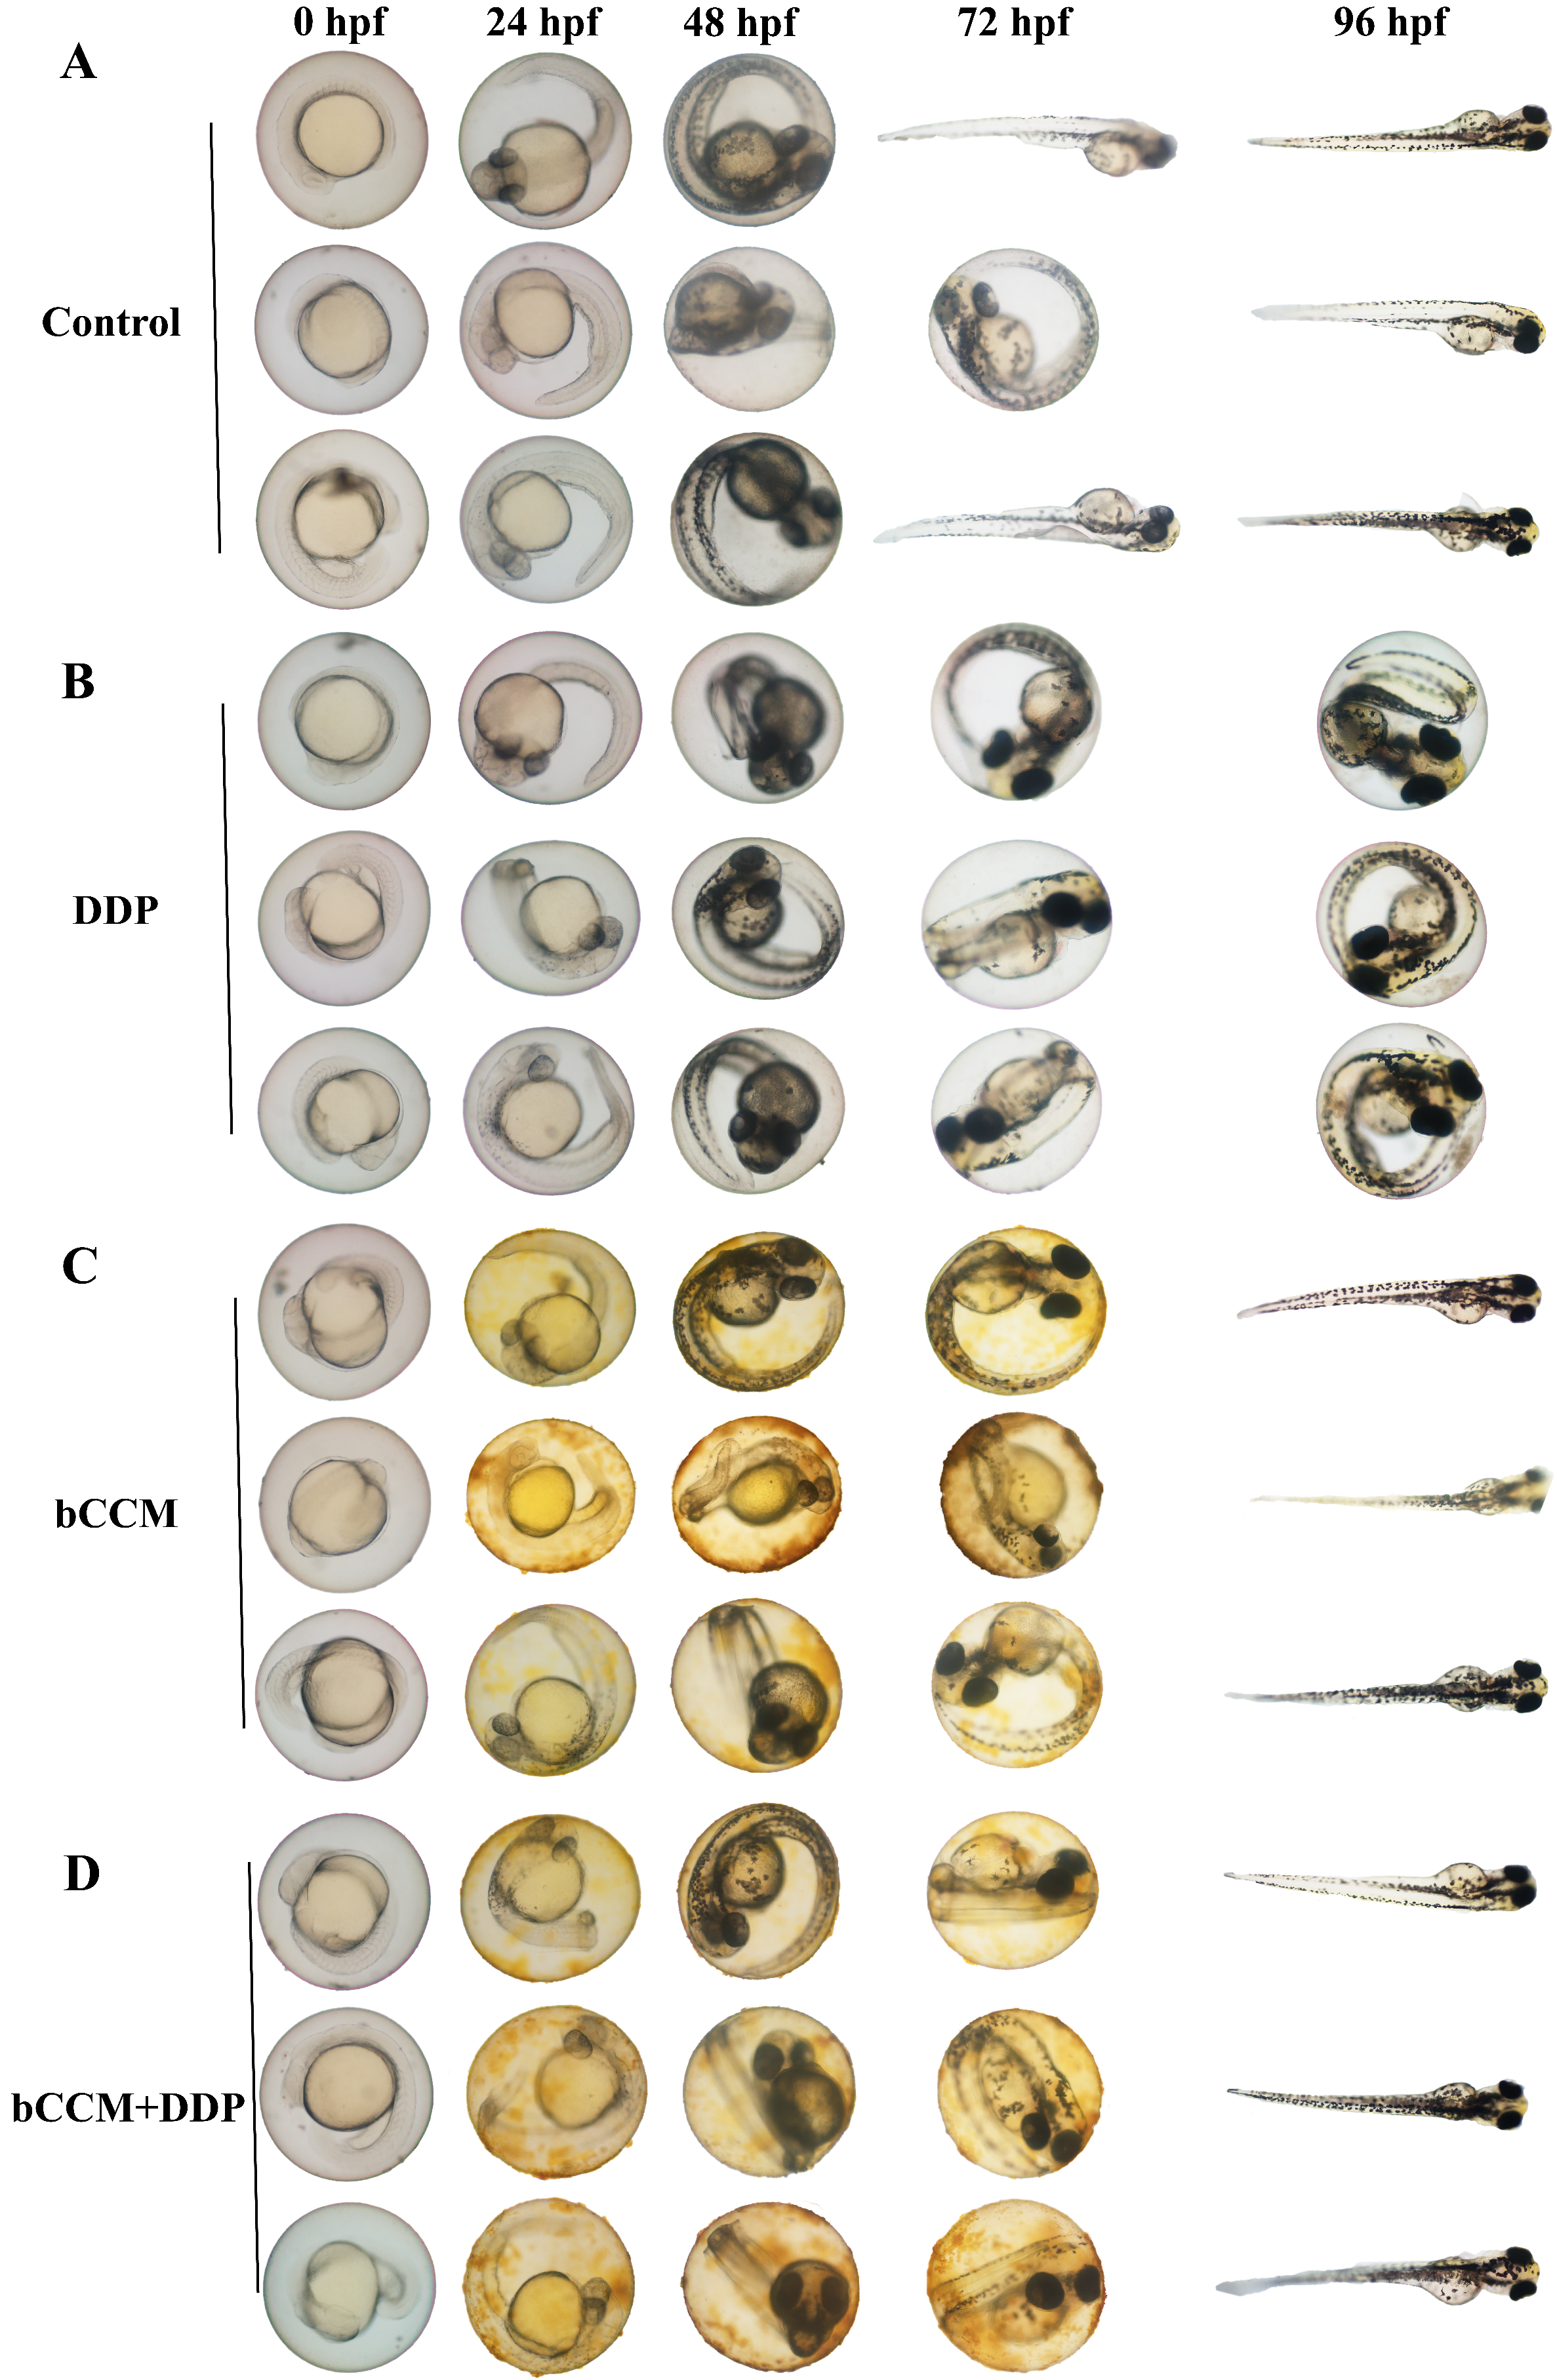


**Fig. S22.** Zebrafish toxicity assay of different groups. (A) Representative images of zebrafish from the Control group. (B) Representative images of zebrafish from the DDP group. (C) Representative images of zebrafish from the **bCCM** group. (D) Representative images of zebrafish from the bCCM+DDP group. (n=3)


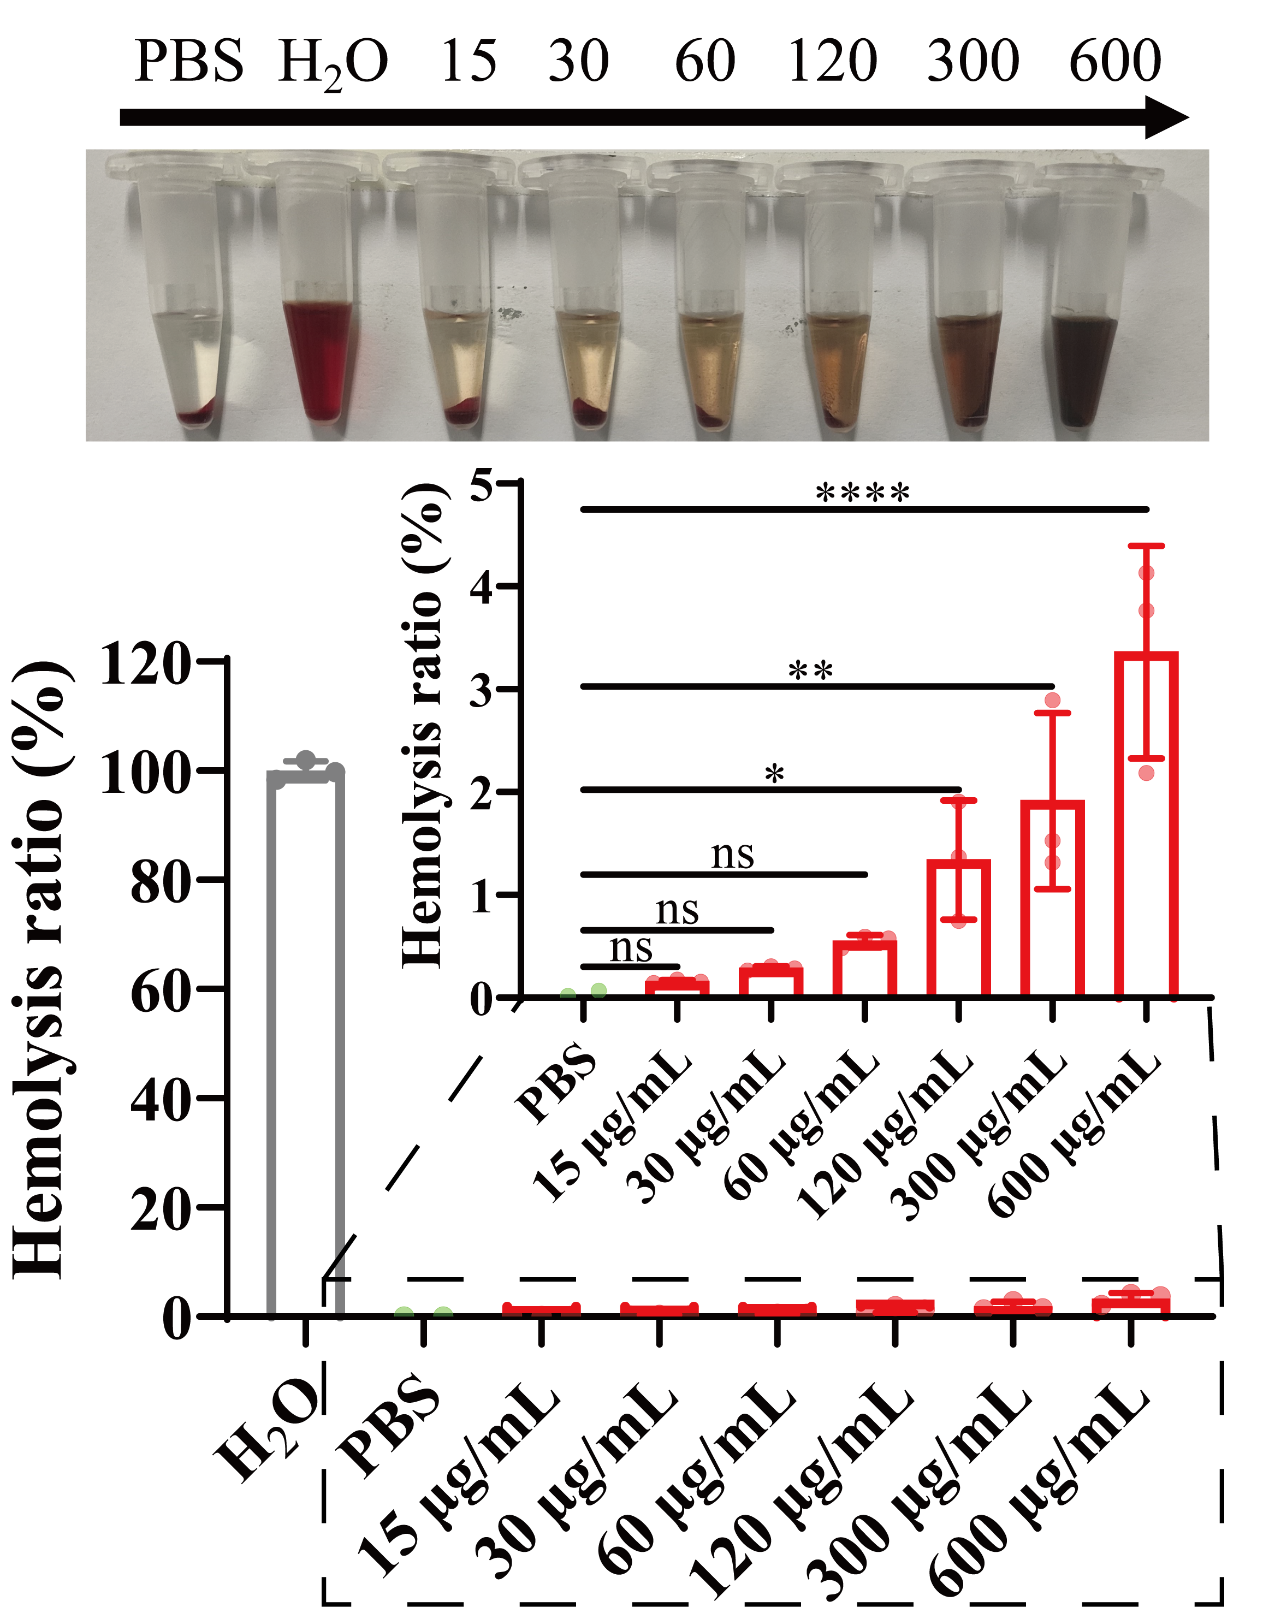


**Fig. S23.** Hemolysis images of erythrocytes incubated in H2O, PBS and **bCCM** and quantification of hemolysis rate. (n ≥ 3; error bars represent SD, *P ≤ 0.05; **P ≤ 0.01; ***P ≤ 0.001; ****P ≤ 0.0001).


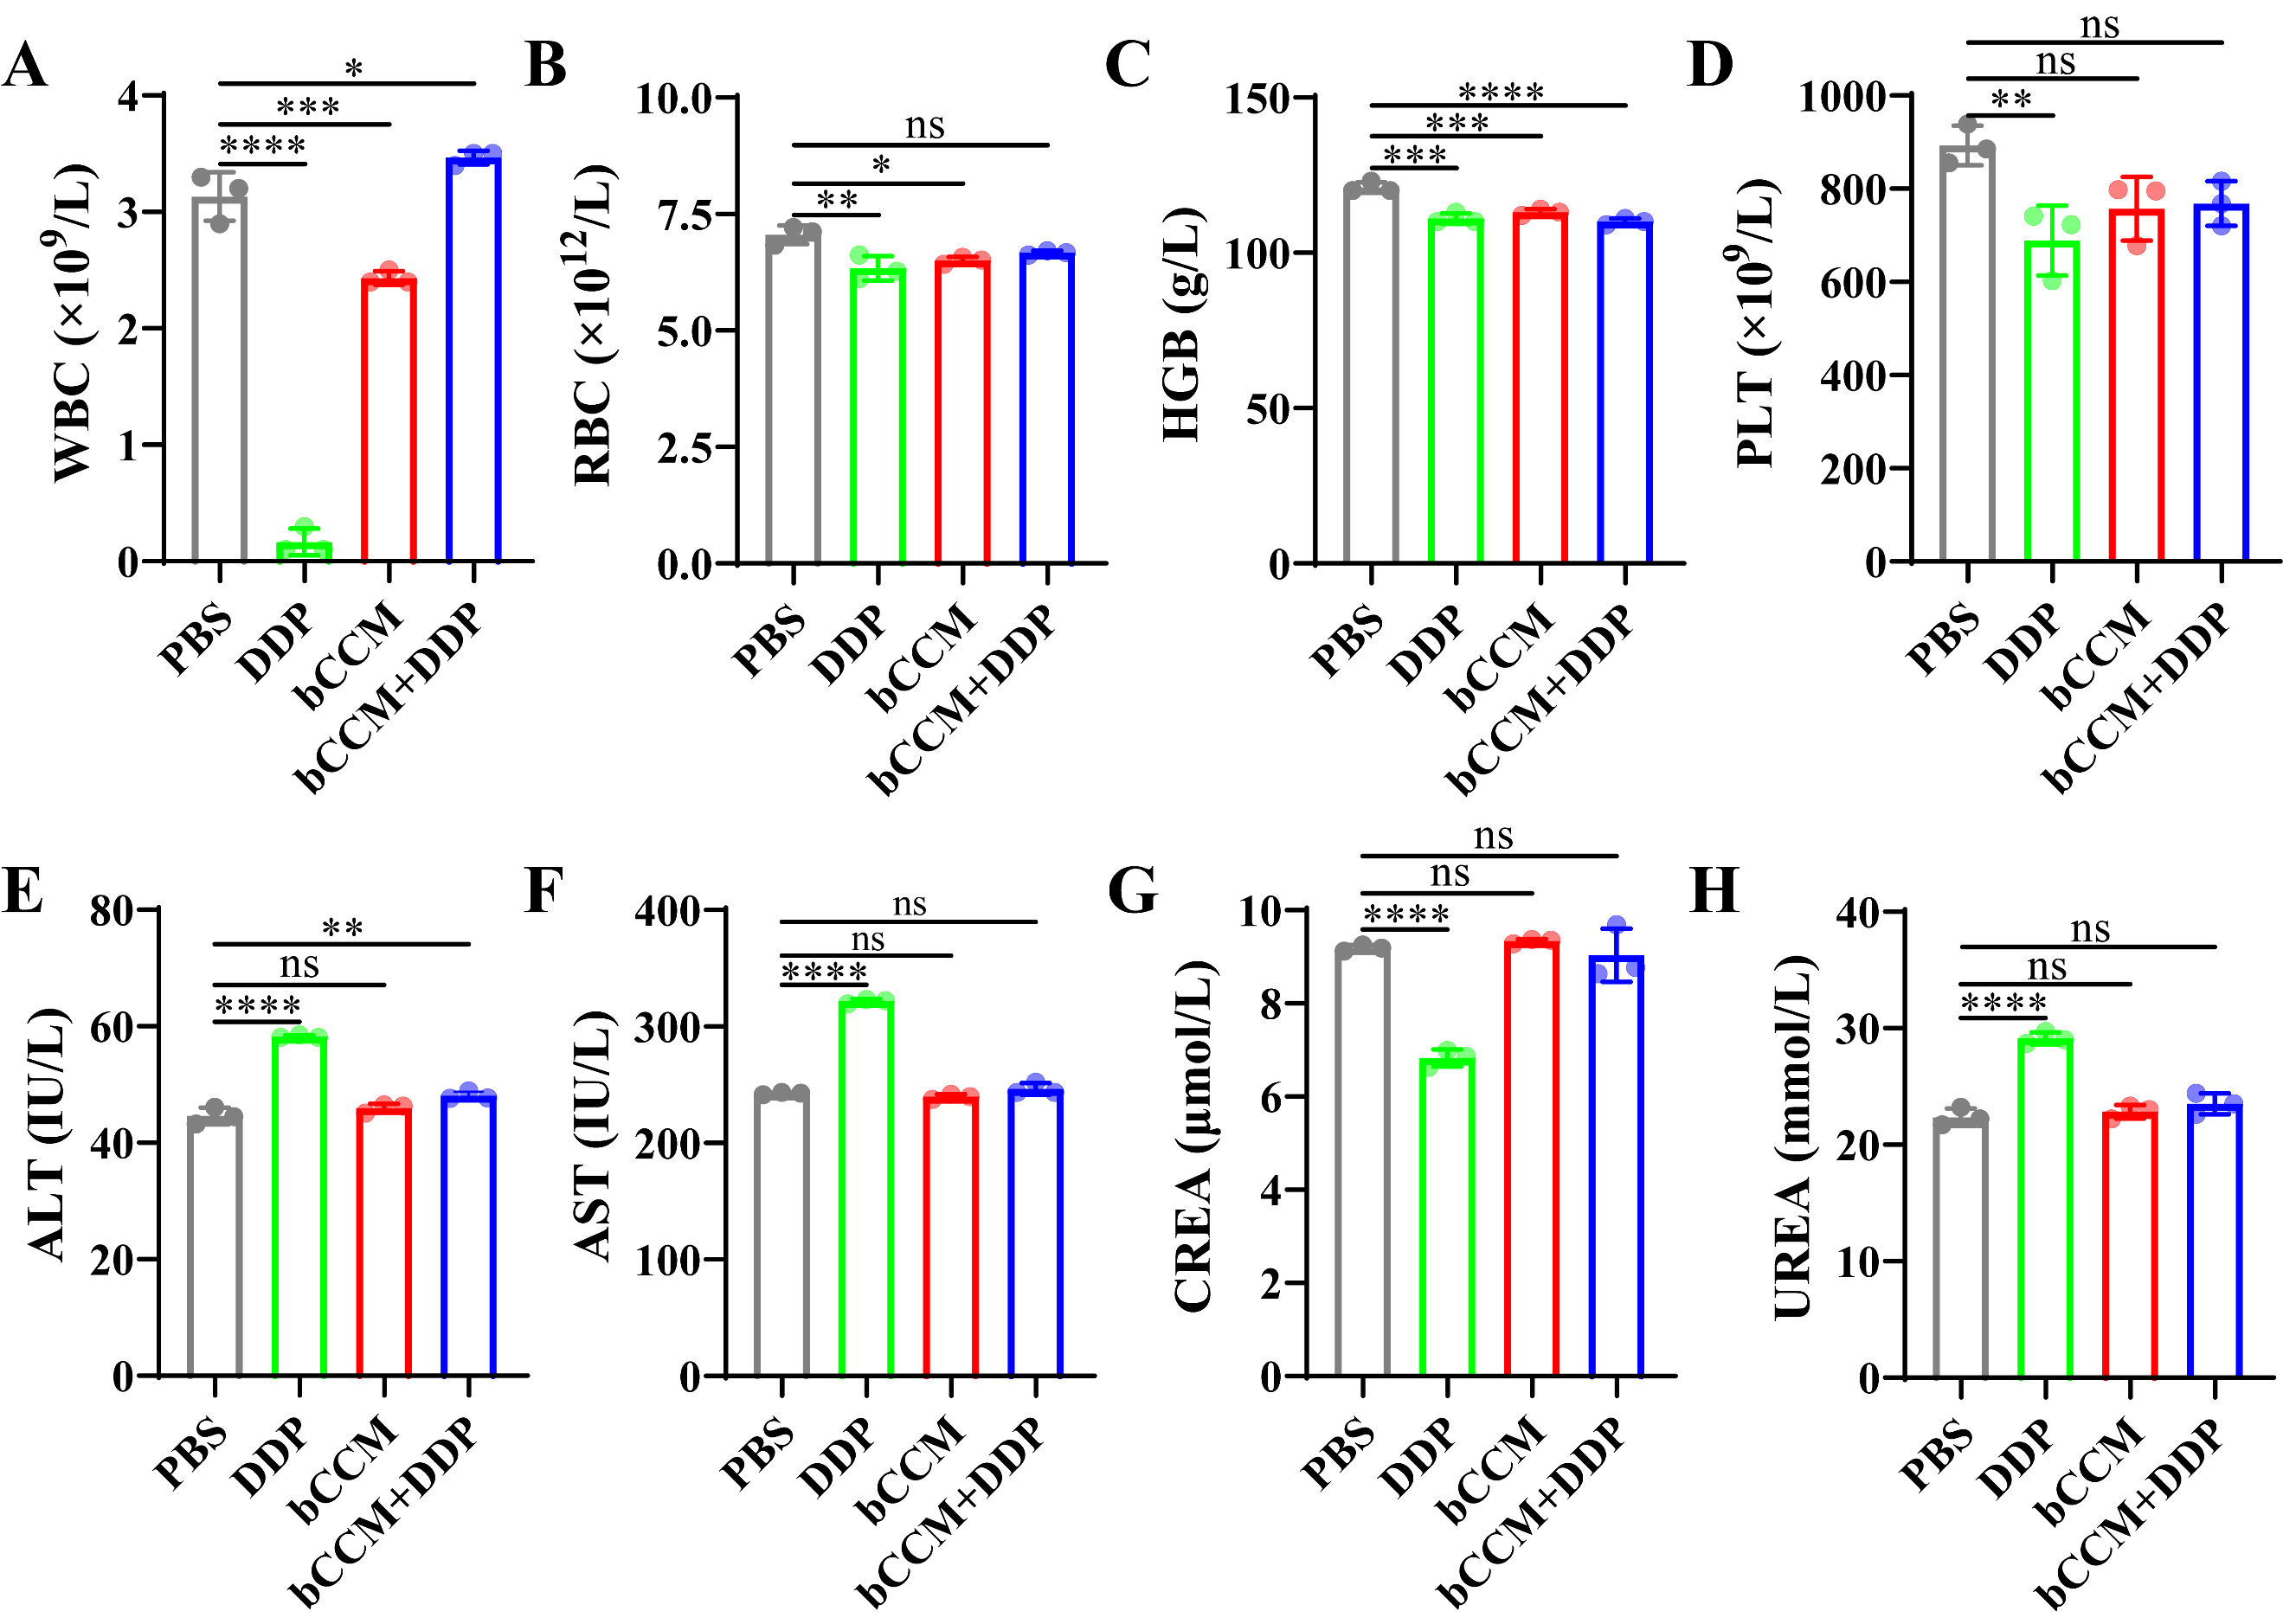


**Fig. S24.** Biosafety and biocompatitably of **bCCM**. (A) WBC: white blood cell, (B) RBC: red blood cell, (C) HGB: hemoglobin, (D) PLT: blood platelet. Liver function markers: (E) ALT: alanine aminotransferase and (F) AST: aspartate aminotransferase. Kidney function markers: (G) CREA: creatinine and (H) BUN: blood urea-nitrogen. Error bars denote the standard deviation. (n ≥ 3; error bars represent SD, *P ≤ 0.05; **P ≤ 0.01; ***P ≤ 0.001; ****P ≤ 0.0001).

**Fig. S25.** Quantitative analysis of mean fluorescence by Tunel assay. (n ≥ 3; error bars represent SD, *P ≤ 0.05; **P ≤ 0.01; ***P ≤ 0.001; ****P ≤ 0.0001).
